# Supplementary material for: Lysosomal Proteomics Links Disturbances in Lipid Homeostasis and Sphingolipid Metabolism to CLN5 Disease
Source: MDPI journal article supplement (doi:10.3390/cells11111840), 2022-06-04
Supplement: s1 [file Supplementary_Tables_final_rev.xlsx]

## Sheet: Lysosomal Confidence
Supplementary Table S1. Scoring system for lysosomal proteins.
	Criteria	Categories	Assigned score
layer 1	Found in SWATHTM data from bovine	SwissProt	2
		TrEMBL	1
	Found in rat lysosomal proteome	Endo-Lysosomes (EL)	2
		Miscellaneous (Misc)	1
layer 2	Found in hLGDB and mLGDB curated datasets	human/mouse	2
	Found in UniProt Knowledgebase with a keyword lysosome	human/mouse	2
	Found in compartments database (GO:0005764, lysosome)	confidence score >4 and <5	2
		confidence score >2 and <4	1
	Found in Human Protein Atlas, HPA	lysosomal localization	2
layer 3	Found in lysosomal datasets from other NCL models	CLN3, CLN6, CLN7, CLN11 lysosomal datasets	2

## Sheet: Cell Model DEP
Supplementary Table S2. Lysosomal assignment and DEPs in the cellular CLN5 KO model.
Gene Symbol	Description	UniProtID	Power	q Value	log FC	Protein ID	Bovine_Lyso	Bovine_Lyso_score	Rat_Lyso_loc	Rat_Lyso_score	UniProt human_Lyso	UniProt human_Lyso_score	hLGDB	hLGDB_score	GO:0005764_Comp_human	Confidence score_GO:0005764_Comp_human	GO_score_human	Evidence_HPA	Score_HPA	Cln3_KO_lysosomes	CLN6_nclf_lysosomes	CLN7_KO_lysosomes	Grn_KO_lysosomes	Score_NCL	Total score	Confidence
CTSB	Cathepsin B OS=Homo sapiens GN=CTSB PE=1 SV=3	P07858	0.9995	8.02e-06	0.698698	sp|P07688|CATB_BOVIN	sp	2	EL	2	hLyso	2	hLGD	2	GO:0005764	5.000	2					Cln7_lyso	Grn KO_Lyso	2	12	Very High
GLB1	Beta-galactosidase OS=Homo sapiens GN=GLB1 PE=1 SV=2	P16278	0.980902	0.00131737	1.36711	tr|F1MUF4|F1MUF4_BOVIN	tr	1	EL	2	hLyso	2	hLGD	2	GO:0005764	4.742	2					Cln7_lyso		2	11	Very High
ASAH1	Acid ceramidase OS=Homo sapiens GN=ASAH1 PE=1 SV=5	Q13510	0.9995	2.06e-08	0.57506				EL	2	hLyso	2	hLGD	2	GO:0005764	5.000	2			Cln3_lyso	Cln6_lyso	Cln7_lyso		2	10	Very High
HEXB	Beta-hexosaminidase subunit beta OS=Homo sapiens GN=HEXB PE=1 SV=3	P07686	0.9995	1.27e-05	0.872574				EL	2	hLyso	2	hLGD	2	GO:0005764	5.000	2					Cln7_lyso	Grn KO_Lyso	2	10	Very High
CTSA	Lysosomal protective protein OS=Homo sapiens GN=CTSA PE=1 SV=2	P10619	0.963204	0.00211907	0.822792				EL	2	hLyso	2	hLGD	2	GO:0005764	5.000	2			Cln3_lyso	Cln6_lyso	Cln7_lyso		2	10	Very High
CTSD	Cathepsin D OS=Homo sapiens GN=CTSD PE=1 SV=1	P07339	0.9995	9.1e-09	0.582427	sp|P80209|CATD_BOVIN	sp	2			hLyso	2	hLGD	2	GO:0005764	5.000	2			Cln3_lyso	Cln6_lyso	Cln7_lyso	Grn KO_Lyso	2	10	Very High
PSAP	Prosaposin OS=Homo sapiens GN=PSAP PE=1 SV=2	C9JIZ6	0.9995	2.38e-06	0.366399	tr|A1L555|A1L555_BOVIN	tr	1	EL	2			hLGD	2	GO:0005764	5.000	2			Cln3_lyso		Cln7_lyso		2	9	Very High
GNS	N-acetylglucosamine-6-sulfatase OS=Homo sapiens GN=GNS PE=1 SV=3	P15586	0.9995	3.71e-08	0.929473	tr|F1MXZ0|F1MXZ0_BOVIN	tr	1			hLyso	2	hLGD	2	GO:0005764	5.000	2			Cln3_lyso		Cln7_lyso		2	9	Very High
RAB14	Ras-related protein Rab-14 OS=Homo sapiens GN=RAB14 PE=1 SV=4	P61106	0.9995	4.62e-08	0.406788	tr|Q3ZBG1|Q3ZBG1_BOVIN	tr	1			hLyso	2	hLGD	2	GO:0005764	4.405	2						Grn KO_Lyso	2	9	Very High
VAMP8	Vesicle-associated membrane protein 8 OS=Homo sapiens GN=VAMP8 PE=1 SV=1	Q9BV40	0.9995	8.84e-07	0.818954	sp|Q3T0Y8|VAMP8_BOVIN	sp	2	EL	2	hLyso	2			GO:0005764	5.000	2								8	Very High
GGH	Gamma-glutamyl hydrolase OS=Homo sapiens GN=GGH PE=1 SV=2	Q92820	0.986742	0.00101341	0.702263						hLyso	2	hLGD	2	GO:0005764	4.545	2					Cln7_lyso		2	8	Very High
GLA	Alpha-galactosidase A OS=Homo sapiens GN=GLA PE=1 SV=1	P06280	0.9995	7.47e-12	1.502						hLyso	2	hLGD	2	GO:0005764	5.000	2			Cln3_lyso		Cln7_lyso		2	8	Very High
CLN5	Ceroid-lipofuscinosis neuronal protein 5 OS=Homo sapiens GN=CLN5 PE=1 SV=1	O75503	0.9995	8.58e-12	-1.41377						hLyso	2	hLGD	2	GO:0005764	5.000	2			Cln3_lyso		Cln7_lyso		2	8	Very High
RAB7A	Ras-related protein Rab-7a OS=Homo sapiens GN=RAB7A PE=1 SV=1	P51149	0.988998	0.000915127	0.441205	tr|F1MJQ1|F1MJQ1_BOVIN	tr	1			hLyso	2	hLGD	2	GO:0005764	4.685	2	HPA_Lyso	2						7	Very High
IGF2R	Cation-independent mannose-6-phosphate receptor OS=Homo sapiens GN=IGF2R PE=1 SV=3	P11717	0.988991	0.000915127	0.430716				EL	2	hLyso	2	hLGD	2	GO:0005764	2.990	1								7	Very High
SCPEP1	Retinoid-inducible serine carboxypeptidase OS=Homo sapiens GN=SCPEP1 PE=1 SV=1	Q9HB40	0.9995	5.82e-06	0.781622				EL	2			hLGD	2						Cln3_lyso		Cln7_lyso		2	6	Very High
TMEM106B	Transmembrane protein 106B OS=Homo sapiens GN=TMEM106B PE=1 SV=2	Q9NUM4	0.994539	0.000592226	1.00765				EL	2					GO:0005764	5.000	2	HPA_Lyso	2		Cln6_lyso		Grn KO_Lyso	2	6	Very High
RAB5C	Ras-related protein Rab-5C OS=Homo sapiens GN=RAB5C PE=1 SV=2	P51148	0.9995	4.62e-08	0.644858	sp|Q58DS9|RAB5C_BOVIN	sp	2					hLGD	2	GO:0005764	4.374	2								6	Very High
GNAI1	Guanine nucleotide-binding protein G(i) subunit alpha-1 OS=Homo sapiens GN=GNAI1 PE=1 SV=2	P63096	0.998365	0.000299025	0.964563	sp|P63097|GNAI1_BOVIN	sp	2					hLGD	2	GO:0005764	4.000	2								6	Very High
SCARB1	Scavenger receptor class B member 1 OS=Homo sapiens GN=SCARB1 PE=1 SV=1	Q8WTV0	0.9995	8.9e-06	0.711346								hLGD	2	GO:0005764	4.610	2	HPA_Lyso	2				Grn KO_Lyso	2	6	Very High
ATP6V0A2	V-type proton ATPase 116 kDa subunit a isoform 2 OS=Homo sapiens GN=ATP6V0A2 PE=1 SV=2	Q9Y487	0.999391	0.000191934	0.476746								hLGD	2	GO:0005764	4.356	2			Cln3_lyso		Cln7_lyso		2	6	Very High
HSP90AA1	Heat shock protein HSP 90-alpha OS=Homo sapiens GN=HSP90AA1 PE=1 SV=5	P07900	0.9995	3.38e-06	0.440941	sp|Q76LV2|HS90A_BOVIN	sp	2	EL	2					GO:0005764	4.530	2								6	Very High
CD63	CD63 antigen OS=Homo sapiens GN=CD63 PE=1 SV=1	F8VV56	0.9995	1.14e-05	1.23252								hLGD	2	GO:0005764	5.000	2			Cln3_lyso		Cln7_lyso	Grn KO_Lyso	2	6	Very High
RRAGD	Ras-related GTP-binding protein D OS=Homo sapiens GN=RRAGD PE=1 SV=1	Q9NQL2	0.999464	0.000180938	-0.45494						hLyso	2	hLGD	2	GO:0005764	5.000	2								6	Very High
LNPEP	Leucyl-cystinyl aminopeptidase OS=Homo sapiens GN=LNPEP PE=1 SV=3	Q9UIQ6	0.999058	0.000229548	0.660017	tr|F1N1Q8|F1N1Q8_BOVIN	tr	1	PM				hLGD	2	GO:0005764	4.262	2								5	High
RAB2A	Ras-related protein Rab-2A OS=Homo sapiens GN=RAB2A PE=1 SV=1	P61019	0.9995	1.26e-08	0.490784	tr|Q148J4|Q148J4_BOVIN	tr	1					hLGD	2	GO:0005764	4.422	2								5	High
STX8	Syntaxin-8 OS=Homo sapiens GN=STX8 PE=1 SV=2	Q9UNK0	0.897682	0.00499459	-1.05166				EL	2	hLyso	2			GO:0005764	3.243	1								5	High
VAT1	Synaptic vesicle membrane protein VAT-1 homolog OS=Homo sapiens GN=VAT1 PE=1 SV=2	Q99536	0.955679	0.00247269	0.415327	tr|F1MUP9|F1MUP9_BOVIN	tr	1	Misc	1					GO:0005764	4.000	2								4	High
GAPDH	Glyceraldehyde-3-phosphate dehydrogenase OS=Homo sapiens GN=GAPDH PE=1 SV=3	P04406	0.9995	9.03e-06	0.623458	sp|P10096|G3P_BOVIN	sp	2	Misc	1					GO:0005764	2.905	1								4	High
STOM	Erythrocyte band 7 integral membrane protein OS=Homo sapiens GN=STOM PE=1 SV=3	P27105	0.9995	2.51e-07	0.504143				EL	2					GO:0005764	4.273	2								4	High
UBA52	Ubiquitin-60S ribosomal protein L40 OS=Homo sapiens GN=UBA52 PE=1 SV=2	P62987	0.967615	0.0019301	0.496844								hLGD	2	GO:0005764	4.166	2								4	High
CPVL	Probable serine carboxypeptidase CPVL OS=Homo sapiens GN=CPVL PE=1 SV=2	Q9H3G5	0.996586	0.00045184	0.74682						hLyso	2	hLGD	2											4	High
SCAMP3	Secretory carrier-associated membrane protein 3 OS=Homo sapiens GN=SCAMP3 PE=1 SV=3	O14828	0.998682	0.000272006	0.363426	sp|Q58DR5|SCAM3_BOVIN	sp	2	Misc	1															3	High
TAGLN2	Transgelin-2 OS=Homo sapiens GN=TAGLN2 PE=1 SV=3	P37802	0.921123	0.00396401	0.558177	sp|Q5E9F5|TAGL2_BOVIN	sp	2	Misc	1															3	High
MYH9	Myosin-9 OS=Homo sapiens GN=MYH9 PE=1 SV=4	P35579	0.9995	8.41e-06	-0.456003	tr|F1MQ37|F1MQ37_BOVIN	tr	1	CS		hLyso	2													3	High
SLC7A5	Large neutral amino acids transporter small subunit 1 OS=Homo sapiens GN=SLC7A5 PE=1 SV=2	Q01650	0.9995	5.63e-07	-0.544282						hLyso	2			GO:0005764	3.775	1								3	High
GABARAPL2	Gamma-aminobutyric acid receptor-associated protein-like 2 OS=Homo sapiens GN=GABARAPL2 PE=1 SV=1	P60520	0.9995	1.08e-07	0.793584						hlyso autophagosome [GO:0005776]	2			GO:0005764	3.145	1								3	High
RAB11FIP1	Rab11 family-interacting protein 1 OS=Homo sapiens GN=RAB11FIP1 PE=1 SV=3	Q6WKZ4	0.944315	0.00295688	0.577042	tr|E1BKQ2|E1BKQ2_BOVIN	tr	1			hLyso recycling endosome [GO:0055037]	2													3	High
LYN	Tyrosine-protein kinase Lyn OS=Homo sapiens GN=LYN PE=1 SV=3	P07948	0.874855	0.00597793	0.377028	tr|F1N261|F1N261_BOVIN	tr	1	PM						GO:0005764	4.401	2								3	High
CPNE3	Copine-3 OS=Homo sapiens GN=CPNE3 PE=1 SV=1	O75131	0.998955	0.000241778	0.711767	tr|A5PJY9|A5PJY9_BOVIN	tr	1	C						GO:0005764	4.151	2								3	High
OCLN	Occludin OS=Homo sapiens GN=OCLN PE=1 SV=1	Q16625	0.9995	7.81e-05	0.701015	tr|Q6PP84|Q6PP84_BOVIN	tr	1							GO:0005764	4.365	2								3	High
SDCBP	Syntenin-1 OS=Homo sapiens GN=SDCBP PE=1 SV=1	B4DHN5	0.9995	3.33e-08	0.94357	tr|A5D9B6|A5D9B6_BOVIN	tr	1							GO:0005764	4.373	2								3	High
PA2G4	Proliferation-associated protein 2G4 OS=Homo sapiens GN=PA2G4 PE=1 SV=3	Q9UQ80	0.95135	0.00265721	0.507224	tr|Q3ZBH5|Q3ZBH5_BOVIN	tr	1							GO:0005764	4.136	2								3	High
AP2A1	AP-2 complex subunit alpha-1 OS=Homo sapiens GN=AP2A1 PE=1 SV=3	O95782	0.9995	0.00010754	-0.857505				PM						GO:0005764	4.251	2								2	Medium
SPTBN1	Spectrin beta chain, non-erythrocytic 1 OS=Homo sapiens GN=SPTBN1 PE=1 SV=2	Q01082	0.9995	1.04e-06	-0.580643	tr|F1MYC9|F1MYC9_BOVIN	tr	1	Misc	1															2	Medium
CHMP4B	Charged multivesicular body protein 4b OS=Homo sapiens GN=CHMP4B PE=1 SV=1	Q9H444	0.981949	0.00126275	0.510473				EL	2															2	Medium
MYL6	Myosin light polypeptide 6 OS=Homo sapiens GN=MYL6 PE=1 SV=1	B7Z6Z4	0.9995	2.06e-08	-0.476173	sp|P60661|MYL6_BOVIN	sp	2	CS																2	Medium
CAPZB	Capping protein (Actin filament) muscle Z-line, beta, isoform CRA_a OS=Homo sapiens GN=CAPZB PE=1 SV=1	B1AK87	0.998952	0.000241778	0.48952	sp|P79136|CAPZB_BOVIN	sp	2	CS																2	Medium
ARHGDIA	Rho GDP-dissociation inhibitor 1 OS=Homo sapiens GN=ARHGDIA PE=1 SV=3	P52565	0.9995	6.27e-07	0.612086	sp|P19803|GDIR1_BOVIN	sp	2	C																2	Medium
MDH1	Malate dehydrogenase, cytoplasmic OS=Homo sapiens GN=MDH1 PE=1 SV=4	P40925	0.829428	0.00840072	-0.531868	sp|Q3T145|MDHC_BOVIN	sp	2	C																2	Medium
EIF4A1	Eukaryotic initiation factor 4A-I OS=Homo sapiens GN=EIF4A1 PE=1 SV=1	P60842	0.979852	0.0013542	0.453588	sp|Q3SZ54|IF4A1_BOVIN	sp	2	C																2	Medium
YWHAB	14-3-3 protein beta/alpha OS=Homo sapiens GN=YWHAB PE=1 SV=3	P31946	0.920716	0.00397478	0.601291	sp|P68250|1433B_BOVIN	sp	2	C																2	Medium
MRPL47	39S ribosomal protein L47, mitochondrial OS=Homo sapiens GN=MRPL47 PE=1 SV=2	Q9HD33	0.808187	0.00972993	-0.404319	sp|Q08DT6|RM47_BOVIN	sp	2																	2	Medium
MDH2	Malate dehydrogenase, mitochondrial OS=Homo sapiens GN=MDH2 PE=1 SV=3	P40926	0.908666	0.00454199	-0.653074	sp|Q32LG3|MDHM_BOVIN	sp	2																	2	Medium
LONP1	Lon protease homolog, mitochondrial OS=Homo sapiens GN=LONP1 PE=1 SV=1	K7EKE6	0.991387	0.000782791	0.514481	sp|Q59HJ6|LONM_BOVIN	sp	2																	2	Medium
NPM1	Nucleophosmin OS=Homo sapiens GN=NPM1 PE=1 SV=2	P06748	0.998417	0.000297523	0.907167	sp|Q3T160|NPM_BOVIN	sp	2																	2	Medium
LDHB	L-lactate dehydrogenase B chain OS=Homo sapiens GN=LDHB PE=1 SV=2	P07195	0.99928	0.000205983	0.477357	sp|Q5E9B1|LDHB_BOVIN	sp	2																	2	Medium
YWHAZ	14-3-3 protein zeta/delta OS=Homo sapiens GN=YWHAZ PE=1 SV=1	P63104	0.862116	0.00660812	0.390162	sp|P63103|1433Z_BOVIN	sp	2																	2	Medium
ATP1B3	Sodium/potassium-transporting ATPase subunit beta-3 OS=Homo sapiens GN=ATP1B3 PE=1 SV=1	P54709	0.9995	2.41e-05	-0.401284	sp|Q3T0C6|AT1B3_BOVIN	sp	2																	2	Medium
CYP51A1	Lanosterol 14-alpha demethylase OS=Homo sapiens GN=CYP51A1 PE=1 SV=1	Q16850	0.9995	7.81e-05	0.358159	sp|Q4PJW3|CP51A_BOVIN	sp	2																	2	Medium
ERP29	Endoplasmic reticulum resident protein 29 OS=Homo sapiens GN=ERP29 PE=1 SV=4	P30040	0.9995	1.72e-05	-0.716454	sp|P81623|ERP29_BOVIN	sp	2																	2	Medium
ACADM	Medium-chain-specific acyl-CoA dehydrogenase, mitochondrial OS=Homo sapiens GN=ACADM PE=1 SV=1	B7Z9I1	0.990234	0.000851441	-0.457134	sp|Q3SZB4|ACADM_BOVIN	sp	2																	2	Medium
LASP1	LIM and SH3 domain protein 1 OS=Homo sapiens GN=LASP1 PE=1 SV=2	Q14847	0.994176	0.000611961	-1.1051	sp|Q3B7M5|LASP1_BOVIN	sp	2																	2	Medium
ACO2	Aconitate hydratase, mitochondrial OS=Homo sapiens GN=ACO2 PE=1 SV=2	Q99798	0.9995	6.45e-09	-0.564644	sp|P20004|ACON_BOVIN	sp	2																	2	Medium
ACTN4	Alpha-actinin-4 OS=Homo sapiens GN=ACTN4 PE=1 SV=2	O43707	0.9995	0.000161058	-1.00814	sp|A5D7D1|ACTN4_BOVIN	sp	2																	2	Medium
HSPA1A	Heat shock 70 kDa protein 1A OS=Homo sapiens GN=HSPA1A PE=1 SV=1	P0DMV8	0.9995	1.75e-05	0.624071	sp|Q27975|HS71A_BOVIN	sp	2																	2	Medium
IDH3A	Isocitrate dehydrogenase [NAD] subunit alpha, mitochondrial OS=Homo sapiens GN=IDH3A PE=1 SV=1	H0YL72	0.99828	0.000306514	-0.685049	sp|P41563|IDH3A_BOVIN	sp	2																	2	Medium
LAP3	Cytosol aminopeptidase OS=Homo sapiens GN=LAP3 PE=1 SV=3	P28838	0.987756	0.00097056	-0.731675	sp|P00727|AMPL_BOVIN	sp	2																	2	Medium
SLC25A11	Mitochondrial 2-oxoglutarate/malate carrier protein (Fragment) OS=Homo sapiens GN=SLC25A11 PE=1 SV=1	I3L1P8	0.856013	0.00694612	-0.597451	sp|P22292|M2OM_BOVIN	sp	2																	2	Medium
PLP2	Proteolipid protein 2 OS=Homo sapiens GN=PLP2 PE=1 SV=1	Q04941	0.9995	6.68e-05	0.645939	sp|Q6Y1E2|PLP2_BOVIN	sp	2																	2	Medium
TOMM40	Mitochondrial import receptor subunit TOM40 homolog OS=Homo sapiens GN=TOMM40 PE=1 SV=1	O96008	0.921898	0.00395456	-0.972964	sp|Q1LZB5|TOM40_BOVIN	sp	2																	2	Medium
SACM1L	Phosphatidylinositide phosphatase SAC1 OS=Homo sapiens GN=SACM1L PE=1 SV=2	Q9NTJ5	0.969755	0.00182984	0.435977	sp|A6QL88|SAC1_BOVIN	sp	2																	2	Medium
RAN	GTP-binding nuclear protein Ran OS=Homo sapiens GN=RAN PE=1 SV=3	P62826	0.9995	0.000170257	0.510364	sp|Q3T054|RAN_BOVIN	sp	2																	2	Medium
TMED9	Transmembrane emp24 domain-containing protein 9 OS=Homo sapiens GN=TMED9 PE=1 SV=2	Q9BVK6	0.9995	8.51e-07	0.836271	sp|Q3T133|TMED9_BOVIN	sp	2																	2	Medium
TMED10	Transmembrane emp24 domain-containing protein 10 OS=Homo sapiens GN=TMED10 PE=1 SV=2	P49755	0.9995	2.95e-09	0.585731	sp|Q5E971|TMEDA_BOVIN	sp	2																	2	Medium
PDIA4	Protein disulfide-isomerase A4 OS=Homo sapiens GN=PDIA4 PE=1 SV=2	P13667	0.9995	7.25e-07	-0.624394	sp|Q29RV1|PDIA4_BOVIN	sp	2																	2	Medium
TXNDC12	Thioredoxin domain-containing protein 12 OS=Homo sapiens GN=TXNDC12 PE=1 SV=1	O95881	0.9995	1.17e-07	-0.642076	sp|Q5E936|TXD12_BOVIN	sp	2																	2	Medium
PGRMC1	Membrane-associated progesterone receptor component 1 OS=Homo sapiens GN=PGRMC1 PE=1 SV=3	O00264	0.9995	8.44e-05	0.46315	sp|Q17QC0|PGRC1_BOVIN	sp	2																	2	Medium
CPNE1	Copine-1 OS=Homo sapiens GN=CPNE1 PE=1 SV=1	Q99829	0.9995	1.17e-07	0.445809										GO:0005764	4.197	2								2	Medium
S100A7	Protein S100-A7 OS=Homo sapiens GN=S100A7 PE=1 SV=4	P31151	0.865998	0.00639738	1.01052										GO:0005764	4.198	2								2	Medium
TMEM181	Transmembrane protein 181 OS=Homo sapiens GN=TMEM181 PE=1 SV=2	Q9P2C4	0.884349	0.00556922	0.565739						hLyso	2													2	Medium
ATP9A	Phospholipid-transporting ATPase OS=Homo sapiens GN=ATP9A PE=1 SV=1	O75110	0.9995	0.000153341	-0.472699						hlyso endosome [GO:0005768]	2													2	Medium
TFRC	Transferrin receptor protein 1 OS=Homo sapiens GN=TFRC PE=1 SV=2	P02786	0.988493	0.000935409	0.892871	tr|E1BIG6|E1BIG6_BOVIN	tr	1	PM						GO:0005764	2.946	1	HPA_Lyso	2						2	Medium
ALDOA	Fructose-bisphosphate aldolase A OS=Homo sapiens GN=ALDOA PE=1 SV=2	P04075	0.9995	7.53e-05	0.454203	tr|A6QLL8|A6QLL8_BOVIN	tr	1	M																1	Medium
GLG1	Golgi apparatus protein 1 OS=Homo sapiens GN=GLG1 PE=1 SV=2	Q92896	0.9995	1.17e-05	0.422104	tr|E1BDY3|E1BDY3_BOVIN	tr	1	G																1	Medium
CTNNA2	Catenin alpha-2 OS=Homo sapiens GN=CTNNA2 PE=1 SV=5	P26232	0.998764	0.000264289	-0.510111	tr|A6QPC5|A6QPC5_BOVIN	tr	1	CS																1	Medium
SLC25A12	Calcium-binding mitochondrial carrier protein Aralar1 OS=Homo sapiens GN=SLC25A12 PE=1 SV=2	O75746	0.9995	5.74e-06	0.461896	tr|A6QNM9|A6QNM9_BOVIN	tr	1																	1	Medium
CYB5B	Cytochrome b5 type B OS=Homo sapiens GN=CYB5B PE=1 SV=2	O43169	0.9995	1.19e-05	0.538504	tr|Q0P5F6|Q0P5F6_BOVIN	tr	1																	1	Medium
HM13	Minor histocompatibility antigen H13 OS=Homo sapiens GN=HM13 PE=1 SV=1	Q8TCT9	0.9995	6.88e-06	0.708743	tr|F1MYW7|F1MYW7_BOVIN	tr	1																	1	Medium
HSD17B4	Peroxisomal multifunctional enzyme type 2 OS=Homo sapiens GN=HSD17B4 PE=1 SV=1	E7EWE5	0.990537	0.000834467	0.507115	tr|Q0IIL6|Q0IIL6_BOVIN	tr	1																	1	Medium
TIMM44	Mitochondrial import inner membrane translocase subunit TIM44 OS=Homo sapiens GN=TIMM44 PE=1 SV=2	O43615	0.960197	0.00225603	-0.743544	tr|E1B844|E1B844_BOVIN	tr	1																	1	Medium
ETFA	Electron transfer flavoprotein subunit alpha, mitochondrial OS=Homo sapiens GN=ETFA PE=1 SV=1	P13804	0.95879	0.00232684	-0.443596	tr|F1MWR3|F1MWR3_BOVIN	tr	1																	1	Medium
FLNA	Filamin-A OS=Homo sapiens GN=FLNA PE=1 SV=4	P21333	0.9995	7.08e-05	-0.70624	tr|F1N169|F1N169_BOVIN	tr	1																	1	Medium
FLNB	Filamin-B OS=Homo sapiens GN=FLNB PE=1 SV=2	O75369	0.9995	1.19e-08	-0.418414	tr|E1BKX7|E1BKX7_BOVIN	tr	1																	1	Medium
EIF4G1	Eukaryotic translation initiation factor 4 gamma 1 OS=Homo sapiens GN=EIF4G1 PE=1 SV=4	Q04637	0.907122	0.0046111	0.367831	tr|F1MX04|F1MX04_BOVIN	tr	1																	1	Medium
GFM1	Elongation factor G, mitochondrial OS=Homo sapiens GN=GFM1 PE=1 SV=2	Q96RP9	0.968473	0.00189577	-0.669677	tr|E1BEJ3|E1BEJ3_BOVIN	tr	1																	1	Medium
LMNB1	Lamin-B1 OS=Homo sapiens GN=LMNB1 PE=1 SV=2	P20700	0.952163	0.00262068	0.517607	tr|A7YY47|A7YY47_BOVIN	tr	1																	1	Medium
VANGL1	Vang-like protein 1 OS=Homo sapiens GN=VANGL1 PE=1 SV=1	Q8TAA9	0.9995	4.03e-05	-0.654955	tr|E1BNR7|E1BNR7_BOVIN	tr	1																	1	Medium
SPTAN1	Spectrin alpha chain, non-erythrocytic 1 OS=Homo sapiens GN=SPTAN1 PE=1 SV=3	Q13813	0.9995	6.11e-05	-0.508709	tr|E1BFB0|E1BFB0_BOVIN	tr	1																	1	Medium
SPCS3	Signal peptidase complex subunit 3 OS=Homo sapiens GN=SPCS3 PE=1 SV=1	P61009	0.9995	0.000134341	-0.550426	tr|F1MMC0|F1MMC0_BOVIN	tr	1																	1	Medium
HADH	Hydroxyacyl-coenzyme A dehydrogenase, mitochondrial OS=Homo sapiens GN=HADH PE=1 SV=1	E9PF18	0.99345	0.000657384	-0.418976	tr|F1N338|F1N338_BOVIN	tr	1																	1	Medium
HDLBP	Vigilin OS=Homo sapiens GN=HDLBP PE=1 SV=2	Q00341	0.986941	0.00100965	-0.51281	tr|F1MT25|F1MT25_BOVIN	tr	1																	1	Medium
DDX21	Nucleolar RNA helicase 2 OS=Homo sapiens GN=DDX21 PE=1 SV=5	Q9NR30	0.9995	1.53e-05	0.503349	tr|A4FV23|A4FV23_BOVIN	tr	1																	1	Medium
DSG2	Desmoglein-2 OS=Homo sapiens GN=DSG2 PE=1 SV=2	Q14126	0.9995	7.09e-06	-0.564259	tr|F1MFC2|F1MFC2_BOVIN	tr	1																	1	Medium
ATP2A2	Sarcoplasmic/endoplasmic reticulum calcium ATPase 2 OS=Homo sapiens GN=ATP2A2 PE=1 SV=1	P16615	0.850266	0.00723891	0.414306	tr|F1MPR3|F1MPR3_BOVIN	tr	1																	1	Medium
ME2	NAD-dependent malic enzyme, mitochondrial OS=Homo sapiens GN=ME2 PE=1 SV=1	P23368	0.81322	0.00942742	0.415319	tr|Q08DM3|Q08DM3_BOVIN	tr	1																	1	Medium
RRAS2	Ras-related protein R-Ras2 OS=Homo sapiens GN=RRAS2 PE=1 SV=1	P62070	0.995231	0.000547957	0.571223	tr|A5PKL2|A5PKL2_BOVIN	tr	1																	1	Medium
PKP2	Plakophilin-2 OS=Homo sapiens GN=PKP2 PE=1 SV=2	Q99959	0.9995	2.38e-06	-0.715423	tr|A4IF71|A4IF71_BOVIN	tr	1																	1	Medium
CALD1	Caldesmon OS=Homo sapiens GN=CALD1 PE=1 SV=3	Q05682	0.9995	1.75e-05	0.881965	tr|F1MLW0|F1MLW0_BOVIN	tr	1																	1	Medium
TOP1	DNA topoisomerase 1 OS=Homo sapiens GN=TOP1 PE=1 SV=2	P11387	0.962598	0.00213822	0.645899	tr|F1MN93|F1MN93_BOVIN	tr	1																	1	Medium
POR	NADPH--cytochrome P450 reductase OS=Homo sapiens GN=POR PE=1 SV=2	P16435	0.981902	0.00126275	0.402462	tr|A5D9D3|A5D9D3_BOVIN	tr	1																	1	Medium
NOP56	Nucleolar protein 56 OS=Homo sapiens GN=NOP56 PE=1 SV=4	O00567	0.9995	1.22e-05	1.53209	tr|F1MW06|F1MW06_BOVIN	tr	1																	1	Medium
NUCB2	Nucleobindin-2 OS=Homo sapiens GN=NUCB2 PE=1 SV=2	P80303	0.9995	1.39e-06	0.588105	tr|Q0IIH5|Q0IIH5_BOVIN	tr	1																	1	Medium
NUMA1	Nuclear mitotic apparatus protein 1 OS=Homo sapiens GN=NUMA1 PE=1 SV=2	Q14980	0.999176	0.000218809	0.49299	tr|F1N7I5|F1N7I5_BOVIN	tr	1																	1	Medium
PDIA6	Protein disulfide-isomerase A6 OS=Homo sapiens GN=PDIA6 PE=1 SV=1	Q15084	0.9995	1.99e-06	-0.449222	tr|A6QNL5|A6QNL5_BOVIN	tr	1																	1	Medium
PCDH7	Protocadherin-7 OS=Homo sapiens GN=PCDH7 PE=1 SV=2	O60245	0.881782	0.00564906	0.471496	tr|E1BCK4|E1BCK4_BOVIN	tr	1																	1	Medium
LMAN2	Vesicular integral-membrane protein VIP36 OS=Homo sapiens GN=LMAN2 PE=1 SV=1	Q12907	0.9995	0.000147081	0.543268	tr|A6QP36|A6QP36_BOVIN	tr	1																	1	Medium
UTRN	Utrophin OS=Homo sapiens GN=UTRN PE=1 SV=2	P46939	0.952479	0.00262068	0.387956	tr|F1MRT9|F1MRT9_BOVIN	tr	1																	1	Medium
RPL18	60S ribosomal protein L18 OS=Homo sapiens GN=RPL18 PE=1 SV=1	G3V203	0.847219	0.00739263	-0.694793	tr|Q0QEV5|Q0QEV5_BOVIN	tr	1																	1	Medium
KPNA2	Importin subunit alpha-1 OS=Homo sapiens GN=KPNA2 PE=1 SV=1	P52292	0.999288	0.000205983	0.5502	tr|Q3SYV6|Q3SYV6_BOVIN	tr	1																	1	Medium
SEC22B	Vesicle-trafficking protein SEC22b OS=Homo sapiens GN=SEC22B PE=1 SV=4	O75396	0.940915	0.00313894	0.634653										GO:0005764	2.028	1								1	Medium
HLA-A	HLA class I histocompatibility antigen, A-26 alpha chain OS=Homo sapiens GN=HLA-A PE=1 SV=2	P30450	0.9995	7.22e-06	0.565438										GO:0005764	2.226	1								1	Medium
EEA1	Early endosome antigen 1 OS=Homo sapiens GN=EEA1 PE=1 SV=2	Q15075	0.9995	0.0001002	0.44593										GO:0005764	3.187	1								1	Medium
HSPA4	Heat shock 70 kDa protein 4 OS=Homo sapiens GN=HSPA4 PE=1 SV=4	P34932	0.963674	0.00210343	0.362814										GO:0005764	2.741	1								1	Medium
CD81	Tetraspanin OS=Homo sapiens GN=CD81 PE=1 SV=1	A6NMH8	0.9995	5.38e-06	-0.614501										GO:0005764	2.265	1								1	Medium
OSBP	Oxysterol-binding protein 1 OS=Homo sapiens GN=OSBP PE=1 SV=1	P22059	0.9995	0.0001002	0.769737										GO:0005764	2.015	1								1	Medium
RAB6A	Ras-related protein Rab-6A OS=Homo sapiens GN=RAB6A PE=1 SV=3	P20340	0.9995	7.03e-05	0.567414										GO:0005764	2.093	1								1	Medium
RAB11A	Ras-related protein Rab-11A OS=Homo sapiens GN=RAB11A PE=1 SV=3	P62491	0.944786	0.00294033	0.681928										GO:0005764	2.960	1								1	Medium
FAM3C	Protein FAM3C OS=Homo sapiens GN=FAM3C PE=1 SV=1	Q92520	0.9995	7.81e-05	0.767982				S																0	Low
SYNGR2	Synaptogyrin-2 OS=Homo sapiens GN=SYNGR2 PE=1 SV=1	K7ELD9	0.9995	1.23e-07	0.638377				PM																0	Low
CYFIP1	Cytoplasmic FMR1-interacting protein 1 OS=Homo sapiens GN=CYFIP1 PE=1 SV=1	Q7L576	0.9995	2.95e-09	-0.933892				C																0	Low
PSMA7	Proteasome subunit alpha type-7 OS=Homo sapiens GN=PSMA7 PE=1 SV=1	O14818	0.955434	0.00247269	0.445615				C																0	Low
CLPP	ATP-dependent Clp protease proteolytic subunit, mitochondrial OS=Homo sapiens GN=CLPP PE=1 SV=1	Q16740	0.9995	3.18e-05	-0.386434																				0	Low
UACA	Uveal autoantigen with coiled-coil domains and ankyrin repeats OS=Homo sapiens GN=UACA PE=1 SV=2	Q9BZF9	0.9995	2.41e-05	-0.479814																				0	Low
EIF5B	Eukaryotic translation initiation factor 5B OS=Homo sapiens GN=EIF5B PE=1 SV=4	O60841	0.9995	3.45e-05	0.361194																				0	Low
ENAH	Protein enabled homolog OS=Homo sapiens GN=ENAH PE=1 SV=2	Q8N8S7	0.890376	0.00526658	-0.535677																				0	Low
CHD4	Chromodomain-helicase-DNA-binding protein 4 OS=Homo sapiens GN=CHD4 PE=1 SV=2	Q14839	0.9995	0.0001002	-0.605887																				0	Low
C2CD5	C2 domain-containing protein 5 OS=Homo sapiens GN=C2CD5 PE=1 SV=1	Q86YS7	0.99937	0.00019445	-0.898681																				0	Low
TNIK	TRAF2 and NCK-interacting protein kinase OS=Homo sapiens GN=TNIK PE=1 SV=1	Q9UKE5	0.966858	0.00195112	-0.86604																				0	Low
TOMM70	Mitochondrial import receptor subunit TOM70 OS=Homo sapiens GN=TOMM70 PE=1 SV=1	O94826	0.9995	1.11e-06	0.888479																				0	Low
CLPX	ATP-dependent Clp protease ATP-binding subunit clpX-like, mitochondrial OS=Homo sapiens GN=CLPX PE=1 SV=2	O76031	0.977536	0.00144811	0.447056																				0	Low
DCD	Dermcidin OS=Homo sapiens GN=DCD PE=1 SV=2	P81605	0.997248	0.000396571	0.590349																				0	Low
TAOK3	Serine/threonine-protein kinase TAO3 OS=Homo sapiens GN=TAOK3 PE=1 SV=2	Q9H2K8	0.967058	0.00194714	0.508617																				0	Low
DOCK11	Dedicator of cytokinesis protein 11 OS=Homo sapiens GN=DOCK11 PE=1 SV=2	Q5JSL3	0.9995	7.04e-05	-0.925522																				0	Low
DLAT	Dihydrolipoyllysine-residue acetyltransferase component of pyruvate dehydrogenase complex, mitochondrial OS=Homo sapiens GN=DLAT PE=1 SV=3	P10515	0.9995	0.000116357	-0.607022																				0	Low
TCOF1	Treacle protein OS=Homo sapiens GN=TCOF1 PE=1 SV=3	Q13428	0.9995	1.57e-07	1.20673																				0	Low
CSTA	Cystatin-A OS=Homo sapiens GN=CSTA PE=1 SV=1	P01040	0.868741	0.00625926	0.508249																				0	Low
MYL12A	Myosin regulatory light chain 12A OS=Homo sapiens GN=MYL12A PE=1 SV=1	J3QRS3	0.9995	1.75e-05	-0.422504																				0	Low
HIST1H2BK	Histone H2B type 1-K OS=Homo sapiens GN=HIST1H2BK PE=1 SV=3	O60814	0.847608	0.00738552	0.442612																				0	Low
LAMA1	Laminin subunit alpha-1 OS=Homo sapiens GN=LAMA1 PE=1 SV=2	P25391	0.879521	0.00574001	-0.403745																				0	Low
REEP5	Receptor expression-enhancing protein 5 OS=Homo sapiens GN=REEP5 PE=1 SV=3	Q00765	0.981899	0.00126275	0.586274																				0	Low
PTPN13	Tyrosine-protein phosphatase non-receptor type 13 OS=Homo sapiens GN=PTPN13 PE=1 SV=2	Q12923	0.931046	0.00355973	-0.409127																				0	Low
LRRFIP2	Leucine-rich repeat flightless-interacting protein 2 OS=Homo sapiens GN=LRRFIP2 PE=1 SV=1	Q9Y608	0.810747	0.00958652	0.472378																				0	Low
LTV1	Protein LTV1 homolog OS=Homo sapiens GN=LTV1 PE=1 SV=1	Q96GA3	0.9995	1.82e-08	1.23612																				0	Low
INA	Alpha-internexin OS=Homo sapiens GN=INA PE=1 SV=2	Q16352	0.991583	0.000776354	0.572095																				0	Low
PPP2R2A	Serine/threonine-protein phosphatase 2A 55 kDa regulatory subunit B alpha isoform OS=Homo sapiens GN=PPP2R2A PE=1 SV=1	P63151	0.9995	0.000116357	0.633008																				0	Low
ROCK1	Rho-associated protein kinase 1 OS=Homo sapiens GN=ROCK1 PE=1 SV=1	Q13464	0.9995	6.04e-08	-0.587684																				0	Low
PKM	Pyruvate kinase PKM OS=Homo sapiens GN=PKM PE=1 SV=4	P14618	0.9995	2.82e-05	0.438638																				0	Low
MYO9A	Unconventional myosin-IXa OS=Homo sapiens GN=MYO9A PE=1 SV=2	B2RTY4	0.945615	0.00290354	0.582288																				0	Low
NCS1	Neuronal calcium sensor 1 OS=Homo sapiens GN=NCS1 PE=1 SV=2	P62166	0.991499	0.000778554	0.424041																				0	Low
NOLC1	Nucleolar and coiled-body phosphoprotein 1 OS=Homo sapiens GN=NOLC1 PE=1 SV=2	Q14978	0.9995	1.52e-05	0.528469																				0	Low
NOMO3	Nodal modulator 3 OS=Homo sapiens GN=NOMO3 PE=3 SV=2	P69849	0.978766	0.0014108	-0.522621																				0	Low
PABPC1	Polyadenylate-binding protein 1 OS=Homo sapiens GN=PABPC1 PE=1 SV=2	P11940	0.9995	1.73e-06	0.709806																				0	Low
PCF11	Pre-mRNA cleavage complex 2 protein Pcf11 OS=Homo sapiens GN=PCF11 PE=1 SV=3	O94913	0.9995	8.44e-05	0.495339																				0	Low
MAP4	Microtubule-associated protein 4 OS=Homo sapiens GN=MAP4 PE=1 SV=3	P27816	0.9995	1.95e-05	-0.410325																				0	Low
SLC6A15	Sodium-dependent neutral amino acid transporter B(0)AT2 OS=Homo sapiens GN=SLC6A15 PE=1 SV=1	Q9H2J7	0.9995	5.23e-05	0.511152																				0	Low
SYAP1	Synapse-associated protein 1 OS=Homo sapiens GN=SYAP1 PE=1 SV=1	Q96A49	0.9995	2.35e-05	1.47232																				0	Low
SUMO3	Small ubiquitin-related modifier 3 OS=Homo sapiens GN=SUMO3 PE=1 SV=1	A8MU27	0.965527	0.00201876	0.486092																				0	Low
STK26	Serine/threonine-protein kinase 26 OS=Homo sapiens GN=STK26 PE=1 SV=2	Q9P289	0.994211	0.000611961	0.422229																				0	Low
SRP14	Signal recognition particle 14 kDa protein OS=Homo sapiens GN=SRP14 PE=1 SV=1	H0YLA2	0.945847	0.00290026	0.687195																				0	Low
SRI	Sorcin OS=Homo sapiens GN=SRI PE=1 SV=1	P30626	0.9995	3.98e-05	0.517464																				0	Low
GOLM1	Golgi membrane protein 1 OS=Homo sapiens GN=GOLM1 PE=1 SV=1	Q8NBJ4	0.994942	0.000562966	0.916472																				0	Low
KIF1A	Kinesin-like protein KIF1A OS=Homo sapiens GN=KIF1A PE=1 SV=2	Q12756	0.9995	1.75e-05	-1.00848																				0	Low
HIST1H1D	Histone H1.3 OS=Homo sapiens GN=HIST1H1D PE=1 SV=2	P16402	0.9995	5.59e-05	0.826782																				0	Low
EPB41L3	Band 4.1-like protein 3 OS=Homo sapiens GN=EPB41L3 PE=1 SV=2	Q9Y2J2	0.9995	1.3e-06	0.800939																				0	Low
PDHA1	Pyruvate dehydrogenase E1 component subunit alpha, somatic form, mitochondrial OS=Homo sapiens GN=PDHA1 PE=1 SV=3	P08559	0.9995	1.75e-05	-0.511462																				0	Low
XRCC5	X-ray repair cross-complementing protein 5 OS=Homo sapiens GN=XRCC5 PE=1 SV=3	P13010	0.976847	0.00148198	-0.45998																				0	Low
SLC12A2	Solute carrier family 12 member 2 OS=Homo sapiens GN=SLC12A2 PE=1 SV=1	P55011	0.878367	0.00579466	0.409623																				0	Low
SCD	Acyl-CoA desaturase OS=Homo sapiens GN=SCD PE=1 SV=2	O00767	0.9995	8.44e-05	-0.52969																				0	Low
ACOT13	Acyl-coenzyme A thioesterase 13 OS=Homo sapiens GN=ACOT13 PE=1 SV=1	Q9NPJ3	0.9995	1.66e-05	-0.599621																				0	Low
ADD1	Alpha-adducin OS=Homo sapiens GN=ADD1 PE=1 SV=2	P35611	0.9995	2.15e-05	-0.669334																				0	Low
IARS	Isoleucine--tRNA ligase, cytoplasmic OS=Homo sapiens GN=IARS PE=1 SV=2	P41252	0.9995	8.44e-05	-0.791889																				0	Low
H1F0	Histone H1.0 OS=Homo sapiens GN=H1F0 PE=1 SV=3	P07305	0.99553	0.000525952	0.476605																				0	Low

## Sheet: Mouse model P-S DEPs
Supplementary Table S3. Lysosomal DEPs in the pre-symptomatic Cln5-/- mouse model.
Gene Symbol	Description	UniProtID	p value	Log2FC	Type(s)	Bovine_Lyso	Bovine_Lyso_score	Rat_Lyso_loc	Rat_Lyso_score	UniProt_mouse_Lyso	Score_UniProt_mouse_Lyso	HLGD_Literature source	Score_HLGD	MLGD_Literature source	Score_MLGD	GO:0005764_Comp	Confidence score_GO:0005764_Comp	GO_score	Cln3_KO_lysosomes	CLN6_nclf_lysosomes	CLN7_KO_lysosomes	Grn_KO_lysosomes	Score_NCL	Total score	Confidence
ARL8B	ADP ribosylation factor like GTPase 8B	Q9CQW2	0.000513	2.4	enzyme	tr	1	EL	2	ARL8B_MOUSE	2	Ashburner M 2000, Leinonen R 2004, Schröder B 2007	2	Leinonen R 2004	2	GO:0005764	5	2						11	Very High
GJA1	gap junction protein alpha 1	P23242	0.00193	-0.68	transporter	sp	2			CXA1_MOUSE	2	Ashburner M 2000	2	Ashburner M 2000	2	GO:0005764	4	2						10	Very High
ATP6AP1	ATPase H+ transporting accessory protein 1	Q9R1Q9	0.00222	0.77	transporter			EL	2			Kanehisa M 2000, Schröder B 2007	2	Kanehisa M 2000	2				CLN3_lyso		CLN7_lyso		2	8	Very High
ATP6V1H	ATPase H+ transporting V1 subunit H	Q8BVE3	0.000558	0.76	transporter			EL	2			Schröder B 2007, Kanehisa M 2000	2	Kanehisa M 2000	2				CLN3_lyso		CLN7_lyso		2	8	Very High
ASS1	argininosuccinate synthase 1	P16460	8.1e-05	0.99	enzyme					ASSY_MOUSE	2	Ashburner M 2000	2	Ashburner M 2000	2	GO:0005764	4	2						8	Very High
ALDOB	aldolase, fructose-bisphosphate B	Q91Y97	4.1e-06	2.88	enzyme					ALDOB_MOUSE	2	Ashburner M 2000	2	Ashburner M 2000	2	GO:0005764	4	2						8	Very High
ANK3	ankyrin 3	G5E8K5	6.03e-07	1.55	other					ANK3_MOUSE	2			Leinonen R 2004	2	GO:0005764	3	2				CLN11_lyso	2	8	Very High
NOS1	nitric oxide synthase 1	Q9Z0J4	3.47e-05	-0.79	enzyme									Ashburner M 2000	2	GO:0005764	4	2				CLN11_lyso	2	6	Very High
SRC	SRC proto-oncogene, non-receptor tyrosine kinase	P05480	0.000578	1.23	kinase	tr	1			SRC_MOUSE	2			Ashburner M 2000	2	GO:0005764	4	2						7	Very High
ANXA11	annexin A11	P97384	0.00295	1.13	other							Ashburner M 2000	2	Ashburner M 2000	2	GO:0005764	4	2						6	Very High
NAPA	NSF attachment protein alpha	Q9DB05	5.34e-05	0.8	transporter	sp	2	EL	2			Schröder B 2007	2											6	Very High
AP3D1	adaptor related protein complex 3 subunit delta 1	O54774	7.58e-05	0.92	other			Misc	1	AP3D1_MOUSE	2	Kanehisa M 2000, Schröder B 2007	2	Kanehisa M 2000	2									7	Very High
ATP6V1C1	ATPase H+ transporting V1 subunit C1	Q9Z1G3	1.23e-05	-0.9	transporter			EL	2			Schröder B 2007	2						CLN3_lyso		CLN7_lyso		2	6	Very High
ATP6V1D	ATPase H+ transporting V1 subunit D	P57746	0.000469	-0.94	transporter			EL	2			Schröder B 2007	2						CLN3_lyso		CLN7_lyso		2	6	Very High
ATP6V1F	ATPase H+ transporting V1 subunit F	Q9D1K2	4.45e-05	1.42	enzyme			EL	2			Schröder B 2007	2								CLN7_lyso		2	6	Very High
AP3B2	adaptor related protein complex 3 subunit beta 2	Q9JME5	6.22e-06	-0.72	other					AP3B2_MOUSE	2	Kanehisa M 2000	2	Kanehisa M 2000	2									6	Very High
GNB1	G protein subunit beta 1	P62874	0.000172	0.87	enzyme	sp	2					Schröder B 2007	2											4	High
GPI	glucose-6-phosphate isomerase	P06745	0.000194	0.99	enzyme	sp	2		2															4	High
ATP6AP2	ATPase H+ transporting accessory protein 2	Q9CYN9	0.00489	-0.66	transporter					RENR_MOUSE	2					GO:0005764	5	2						4	High
Marcks	myristoylated alanine rich protein kinase C substrate	P26645	4.34e-06	-0.7	other					MARCS_MOUSE	2					GO:0005764	4	2						4	High
SOD1	superoxide dismutase 1	P08228	0.000273	1.12	enzyme					SODC_MOUSE	2					GO:0005764	4	2						4	High
ATP6AP2	ATPase H+ transporting accessory protein 2	Q9CYN9	0.00489	-0.66	transporter					RENR_MOUSE	2					GO:0005764	4	2						4	High
SLC7A5	solute carrier family 7 member 5	Q9Z127	0.000231	0.83	transporter					LAT1_MOUSE	2					GO:0005764	3	2						4	High
PARK7	Parkinsonism associated deglycase	Q99LX0	6.08e-05	-0.79	enzyme	sp	2	Misc	1															3	High
SCAMP3	secretory carrier membrane protein 3	O35609	2.21e-05	-0.83	transporter	sp	2	Misc	1															3	High
SLC12A4	solute carrier family 12 member 4	Q9JIS8	7.24e-05	-1.04	transporter	tr	1					Schröder B 2007	2											3	High
GAPDH	glyceraldehyde-3-phosphate dehydrogenase	P16858	7.91e-05	-0.61	enzyme	sp	2	Misc	1															3	High
GSTP1	glutathione S-transferase pi 1	P19157	0.0015	1.23	enzyme	sp	2	Misc	1															3	High
DYNC1LI2	dynein cytoplasmic 1 light intermediate chain 2	Q6PDL0	0.00283	-1.05	other					DC1L2_MOUSE	2					GO:0005764	2	1						3	High
MYH9	myosin heavy chain 9	Q8VDD5	0.00056	-0.82	enzyme	tr	1			MYH9_MOUSE	2													3	High
MDH2	malate dehydrogenase 2	P08249	2.17e-05	0.91	enzyme	sp	2																	2	Medium
MYH1	myosin heavy chain 1	Q5SX40	0.00589	3.07	enzyme									Zhang H 2007	2									2	Medium
NDUFA12	NADH:ubiquinone oxidoreductase subunit A12	Q7TMF3	0.000379	1.47	enzyme	sp	2																	2	Medium
NDUFA13	NADH:ubiquinone oxidoreductase subunit A13	Q9ERS2	5.19e-05	1.1	enzyme	sp	2																	2	Medium
NDUFA4	NDUFA4 mitochondrial complex associated	Q62425	2.88e-11	1.5	enzyme	sp	2																	2	Medium
NDUFA6	NADH:ubiquinone oxidoreductase subunit A6	Q9CQZ5	6.15e-09	1.22	enzyme	sp	2																	2	Medium
NDUFB5	NADH:ubiquinone oxidoreductase subunit B5	Q9CQH3	0.000813	2.05	enzyme	sp	2																	2	Medium
OGDH	oxoglutarate dehydrogenase	Q60597	0.00407	0.73	enzyme	sp	2																	2	Medium
PC	pyruvate carboxylase	Q05920	2.45e-06	1.22	enzyme	sp	2																	2	Medium
PDHB	pyruvate dehydrogenase E1 subunit beta	Q9D051	2.81e-10	0.69	enzyme	sp	2																	2	Medium
PDIA4	protein disulfide isomerase family A member 4	P08003	0.0197	0.73	enzyme	sp	2																	2	Medium
HIBADH	3-hydroxyisobutyrate dehydrogenase	Q99L13	1.19e-07	0.72	enzyme	sp	2																	2	Medium
HSP90B1	heat shock protein 90 beta family member 1	P08113	0.000645	0.63	other	sp	2																	2	Medium
HSPE1	heat shock protein family E (Hsp10) member 1	Q64433	4.68e-08	1.47	enzyme	sp	2																	2	Medium
LDHA	lactate dehydrogenase A	P06151	0.00562	0.64	enzyme	sp	2																	2	Medium
LONP1	lon peptidase 1, mitochondrial	Q8CGK3	0.00188	2.13	peptidase	sp	2																	2	Medium
PRDX1	peroxiredoxin 1	P35700	0.000174	-0.66	enzyme	sp	2																	2	Medium
PRDX5	peroxiredoxin 5	P99029	1.45e-05	1.32	enzyme	sp	2																	2	Medium
RAB8A	RAB8A, member RAS oncogene family	P55258	0.016	0.71	enzyme	sp	2																	2	Medium
RAN	RAN, member RAS oncogene family	P62827	3.63e-05	-0.62	enzyme	sp	2																	2	Medium
RPL7	ribosomal protein L7	P14148	7.98e-07	0.72	transcription regulator	sp	2																	2	Medium
RPS9	ribosomal protein S9	Q6ZWN5	0.000289	0.64	translation regulator	sp	2																	2	Medium
SCO1	synthesis of cytochrome C oxidase 1	Q5SUC9	0.000664	-0.96	other	sp	2																	2	Medium
SLC25A11	solute carrier family 25 member 11	Q9CR62	1.66e-08	0.77	transporter	sp	2																	2	Medium
SLC2A1	solute carrier family 2 member 1	P17809	0.000673	0.93	transporter	sp	2																	2	Medium
STMN1	stathmin 1	P54227	0.000106	-0.72	other	sp	2																	2	Medium
STX12	syntaxin 12	Q9ER00	0.000549	1.21	other			EL	2															2	Medium
SUCLG2	succinate-CoA ligase GDP-forming subunit beta	Q9Z2I8	0.00936	0.59	enzyme	sp	2																	2	Medium
TMEM65	transmembrane protein 65	Q4VAE3	0.000255	1.54	other	sp	2																	2	Medium
Tpm1	tropomyosin 1, alpha	P58771	0.000791	2.21	other	sp	2																	2	Medium
TXN	thioredoxin	P10639	6.39e-05	-0.61	enzyme	sp	2																	2	Medium
UQCRB	ubiquinol-cytochrome c reductase binding protein	Q9D855	6.42e-06	2.6	enzyme	sp	2																	2	Medium
VAPB	VAMP associated protein B and C	Q9QY76	0.00139	0.67	other	sp	2																	2	Medium
VDAC2	voltage dependent anion channel 2	Q60930	3.59e-05	0.7	ion channel	sp	2																	2	Medium
VPS29	VPS29 retromer complex component	Q9QZ88	0.000338	-0.69	transporter			EL	2															2	Medium
APMAP	adipocyte plasma membrane associated protein	Q9D7N9	0.000137	0.74	enzyme	sp	2																	2	Medium
ARPC4	actin related protein 2/3 complex subunit 4	P59999	8.93e-05	0.64	other	sp	2																	2	Medium
ASRGL1	asparaginase and isoaspartyl peptidase 1	Q8C0M9	0.000667	1.22	enzyme	sp	2																	2	Medium
ACADM	acyl-CoA dehydrogenase medium chain	P45952	0.00141	0.76	enzyme	sp	2																	2	Medium
ACADVL	acyl-CoA dehydrogenase very long chain	P50544	0.000186	1.01	enzyme	sp	2																	2	Medium
ACO2	aconitase 2	Q99KI0	6.72e-07	0.66	enzyme	sp	2																	2	Medium
ACTN1	actinin alpha 1	Q7TPR4	0.000189	1.28	transcription regulator	sp	2																	2	Medium
ACTN4	actinin alpha 4	P57780	0.00708	0.61	transcription regulator	sp	2																	2	Medium
CAPZA2	capping actin protein of muscle Z-line subunit alpha 2	P47754	2.62e-05	2.5	other	sp	2																	2	Medium
CHP1	calcineurin like EF-hand protein 1	P61022	0.000793	1.83	other	sp	2																	2	Medium
CPT2	carnitine palmitoyltransferase 2	P52825	5.11e-06	-1.2	enzyme	sp	2																	2	Medium
Crip2	cysteine rich protein 2	Q9DCT8	0.0167	1.07	other	sp	2																	2	Medium
CTNNA1	catenin alpha 1	P26231	0.00581	-1.19	other	sp	2																	2	Medium
DLST	dihydrolipoamide S-succinyltransferase	Q9D2G2	8.77e-06	1.16	enzyme	sp	2																	2	Medium
EIF2S1	eukaryotic translation initiation factor 2 subunit alpha	Q6ZWX6	0.00623	-2.11	translation regulator	sp	2																	2	Medium
ERP29	endoplasmic reticulum protein 29	P57759	0.00331	0.87	transporter	sp	2																	2	Medium
ETFB	electron transfer flavoprotein subunit beta	Q9DCW4	1.82e-06	1.41	transporter	sp	2																	2	Medium
EZR	ezrin	P26040	0.0042	1	other	sp	2																	2	Medium
FKBP1A	FKBP prolyl isomerase 1A	P26883	6.37e-05	-0.64	enzyme	sp	2																	2	Medium
GDI2	GDP dissociation inhibitor 2	Q61598	0.000609	0.59	other	sp	2																	2	Medium
GNG2	G protein subunit gamma 2	P63213	0.00529	1.03	enzyme	sp	2																	2	Medium
NCAM1	neural cell adhesion molecule 1	P13595	5.16e-06	-0.69	other	tr	1																	1	Medium
NDUFS3	NADH:ubiquinone oxidoreductase core subunit S3	Q9DCT2	0.00314	1.43	enzyme	tr	1																	1	Medium
Nptn	neuroplastin	P97300	4.88e-07	-0.87	other	tr	1																	1	Medium
OSBPL8	oxysterol binding protein like 8	B9EJ86	0.0161	1.32	transporter	tr	1																	1	Medium
HADHA	hydroxyacyl-CoA dehydrogenase trifunctional multienzyme complex subunit alpha	Q8BMS1	0.00167	0.63	enzyme	tr	1																	1	Medium
KIAA1217	KIAA1217	A2AQ25	0.000326	1.36	other	tr	1																	1	Medium
L1CAM	L1 cell adhesion molecule	P11627	6.59e-06	-0.67	other	tr	1																	1	Medium
PPFIBP1	PPFIA binding protein 1	Q8C8U0	0.00377	1.98	other	tr	1																	1	Medium
PPL	periplakin	Q9R269	0.0127	-0.89	other	tr	1																	1	Medium
PRKCA	protein kinase C alpha	P20444	8.41e-06	1.28	kinase	tr	1																	1	Medium
RAB1A	RAB1A, member RAS oncogene family	P62821	0.00421	0.79	enzyme	tr	1																	1	Medium
RAB23	RAB23, member RAS oncogene family	P35288	9.18e-06	0.98	enzyme	tr	1																	1	Medium
RAB35	RAB35, member RAS oncogene family	Q6PHN9	0.00265	0.78	enzyme	tr	1																	1	Medium
SIRT2	sirtuin 2	Q8VDQ8	2.44e-05	0.92	transcription regulator					SIR2_MOUSE	2													2	Medium
SLC30A1	solute carrier family 30 member 1	Q60738	0.00108	2.04	transporter	tr	1																	1	Medium
SLC39A10	solute carrier family 39 member 10	Q6P5F6	0.00111	1.12	transporter	tr	1																	1	Medium
STRN	striatin	O55106	0.000328	0.79	other	tr	1																	1	Medium
SYNGR1	synaptogyrin 1	O55100	1.43e-07	1.52	transporter			Misc	1															1	Medium
TMX3	thioredoxin related transmembrane protein 3	Q8BXZ1	0.00525	0.76	enzyme	tr	1																	1	Medium
WDR1	WD repeat domain 1	O88342	0.000189	0.67	other	tr	1																	1	Medium
APOB	apolipoprotein B	E9Q414	0.000159	-0.59	transporter	tr	1																	1	Medium
ATP1B1	ATPase Na+/K+ transporting subunit beta 1	P14094	3.41e-06	0.78	transporter	tr	1																	1	Medium
AKR1B1	aldo-keto reductase family 1 member B	P45376	0.014	0.6	enzyme			Misc	1															1	Medium
ALCAM	activated leukocyte cell adhesion molecule	Q61490	0.000881	1.18	other	tr	1																	1	Medium
ALDH5A1	aldehyde dehydrogenase 5 family member A1	Q8BWF0	4.41e-09	1.18	enzyme	tr	1																	1	Medium
ALDH7A1	aldehyde dehydrogenase 7 family member A1	Q9DBF1	0.000441	1.25	enzyme	tr	1																	1	Medium
CFL1	cofilin 1	P18760	0.00289	1.09	other	tr	1																	1	Medium
CKAP4	cytoskeleton associated protein 4	Q8BMK4	0.0161	-0.98	other	tr	1																	1	Medium
CORO1C	coronin 1C	Q9WUM4	2.11e-09	2.22	other	tr	1																	1	Medium
CTNNA1	catenin alpha 1	P26231	0.00581	-1.19	other	tr	1																	1	Medium
EHD3	EH domain containing 3	Q9QXY6	0.000897	0.74	other					EHD3_MOUSE	2													2	Medium
EPB41L2	erythrocyte membrane protein band 4.1 like 2	O70318	0.000369	-0.7	other	tr	1																	1	Medium
EPN1	epsin 1	Q80VP1	0.0119	1.37	other	tr	1																	1	Medium
FH	fumarate hydratase	P97807	1.61e-12	0.83	enzyme	tr	1																	1	Medium
GANAB	glucosidase II alpha subunit	Q8BHN3	0.00445	1.5	enzyme	tr	1																	1	Medium
GLG1	golgi glycoprotein 1	Q61543	3.26e-07	-0.69	other	tr	1																	1	Medium
GNA13	G protein subunit alpha 13	P27601	0.0114	0.71	enzyme	tr	1																	1	Medium
LRRC57	leucine rich repeat containing 57	Q9D1G5	0.000667	0.87	other																			0	Low
LSAMP	limbic system associated membrane protein	Q8BLK3	0.000703	0.82	other																			0	Low
LTA4H	leukotriene A4 hydrolase	P24527	0.00736	1.08	enzyme																			0	Low
LXN	latexin	P70202	0.00817	1.51	other																			0	Low
MAG	myelin associated glycoprotein	P20917	1.92e-06	2.11	other																			0	Low
MAOA	monoamine oxidase A	Q64133	0.0017	0.79	enzyme																			0	Low
MAPRE1	microtubule associated protein RP/EB family member 1	Q61166	0.000132	1.09	other																			0	Low
MARK2	microtubule affinity regulating kinase 2	Q05512	0.00436	0.71	kinase																			0	Low
MMUT	methylmalonyl-CoA mutase	P16332	3.79e-07	1.51	enzyme																			0	Low
MPP2	membrane palmitoylated protein 2	Q9WV34	0.00213	1.26	kinase																			0	Low
MRPL12	mitochondrial ribosomal protein L12	Q9DB15	0.000198	0.89	other																			0	Low
mt-Atp8	ATP synthase F0 subunit 8	P03930	0.00738	-1.05	enzyme																			0	Low
MTCH1	mitochondrial carrier 1	Q791T5	0.00126	0.86	other																			0	Low
MT-CO2	cytochrome c oxidase subunit II	P00405	0.00158	2.21	enzyme																			0	Low
MTMR1	myotubularin related protein 1	Q9Z2C4	0.00163	1.42	phosphatase																			0	Low
MTUS2	microtubule associated scaffold protein 2	Q3UHD3	0.00212	-0.66	other																			0	Low
MYH11	myosin heavy chain 11	O08638	0.000274	0.76	other																			0	Low
MYH14	myosin heavy chain 14	Q6URW6	0.00089	-1.15	enzyme																			0	Low
MYLK2	myosin light chain kinase 2	Q8VCR8	0.000311	2.26	kinase																			0	Low
MYO18A	myosin XVIIIA	Q9JMH9	0.0042	-0.9	other																			0	Low
MYO5B	myosin VB	P21271	0.00213	0.65	enzyme																			0	Low
NBEA	neurobeachin	Q9EPN1	0.00473	0.82	other																			0	Low
NCALD	neurocalcin delta	Q91X97	0.00233	0.79	other																			0	Low
NCK1	NCK adaptor protein 1	Q99M51	0.000249	1.42	kinase																			0	Low
NCK2	NCK adaptor protein 2	O55033	3.16e-05	6.64	kinase																			0	Low
NCOA7	nuclear receptor coactivator 7	Q6DFV7	0.000281	-0.76	transcription regulator																			0	Low
NDRG3	NDRG family member 3	Q9QYF9	0.000195	0.95	other																			0	Low
NDUFB8	NADH:ubiquinone oxidoreductase subunit B8	Q9D6J5	1.18e-05	1.32	enzyme																			0	Low
NEDD4L	NEDD4 like E3 ubiquitin protein ligase	Q8CFI0	0.00357	0.87	enzyme																			0	Low
NEMF	nuclear export mediator factor	Q8CCP0	0.000772	-1.19	other																			0	Low
NGEF	neuronal guanine nucleotide exchange factor	Q8CHT1	0.00522	0.59	other																			0	Low
NLN	neurolysin	Q91YP2	0.00143	1.89	peptidase																			0	Low
NRAP	nebulin related anchoring protein	Q80XB4	0.00027	1.16	other																			0	Low
NT5DC3	5'-nucleotidase domain containing 3	Q3UHB1	0.0033	0.61	other																			0	Low
OFD1	OFD1 centriole and centriolar satellite protein	Q80Z25	1.81e-07	0.66	other																			0	Low
OLFM1	olfactomedin 1	O88998	0.005	-1.42	other																			0	Low
Pakap	paralemmin A kinase anchor protein	Q8BR92	0.0025	0.63	other																			0	Low
PCBP2	poly(rC) binding protein 2	Q61990	0.00114	0.74	other																			0	Low
PCCB	propionyl-CoA carboxylase subunit beta	Q99MN9	0.00571	2.12	enzyme																			0	Low
PCP4	Purkinje cell protein 4	P63054	0.00501	1.46	other																			0	Low
PDE10A	phosphodiesterase 10A	Q8CA95	1.39e-09	2.14	enzyme																			0	Low
PDE1A	phosphodiesterase 1A	Q61481	3.54e-05	0.67	enzyme																			0	Low
PDHA1	pyruvate dehydrogenase E1 subunit alpha 1	P35486	9.15e-09	0.71	enzyme																			0	Low
PEX5L	peroxisomal biogenesis factor 5 like	Q8C437	0.00176	-0.67	ion channel																			0	Low
PFKL	phosphofructokinase, liver type	P12382	6.39e-05	-1.2	kinase																			0	Low
PFKM	phosphofructokinase, muscle	P47857	8.87e-09	1.22	kinase																			0	Low
PFN1	profilin 1	P62962	0.0147	0.98	other																			0	Low
PHF24	PHD finger protein 24	Q80TL4	3.88e-05	-0.59	other																			0	Low
HNMT	histamine N-methyltransferase	Q91VF2	0.000166	-0.81	enzyme																			0	Low
HSPA12A	heat shock protein family A (Hsp70) member 12A	Q8K0U4	0.000465	0.76	other																			0	Low
HSPA4L	heat shock protein family A (Hsp70) member 4 like	P48722	4.28e-05	0.64	other																			0	Low
IDE	insulin degrading enzyme	Q9JHR7	1.03e-05	-0.67	peptidase																			0	Low
ITSN1	intersectin 1	Q9Z0R4	5.01e-05	-0.61	other																			0	Low
KCNAB2	potassium voltage-gated channel subfamily A regulatory beta subunit 2	P62482	1.08e-05	-0.64	ion channel																			0	Low
KCTD12	potassium channel tetramerization domain containing 12	Q6WVG3	0.00288	1.28	ion channel																			0	Low
KIF20B	kinesin family member 20B	Q80WE4	3.31e-06	-0.96	enzyme																			0	Low
KIF5A	kinesin family member 5A	P33175	2.5e-05	1.08	transporter																			0	Low
KIF5C	kinesin family member 5C	P28738	1.08e-05	-0.74	enzyme																			0	Low
LIMCH1	LIM and calponin homology domains 1	Q3UH68	4.96e-06	-1.37	other																			0	Low
LINGO1	leucine rich repeat and Ig domain containing 1	Q9D1T0	0.000554	0.71	other																			0	Low
LNPK	lunapark, ER junction formation factor	Q7TQ95	2.67e-08	-0.93	other																			0	Low
PIP5K1C	phosphatidylinositol-4-phosphate 5-kinase type 1 gamma	O70161	0.00425	1.2	kinase																			0	Low
PITPNM1	phosphatidylinositol transfer protein membrane associated 1	O35954	0.0048	-0.61	transporter																			0	Low
PLP1	proteolipid protein 1	P60202	0.000906	0.74	other																			0	Low
PLXNA1	plexin A1	P70206	1.29e-07	0.65	transmembrane receptor																			0	Low
PLXND1	plexin D1	Q3UH93	0.000695	1.45	transmembrane receptor																			0	Low
PPA1	inorganic pyrophosphatase 1	Q9D819	0.000279	-0.93	enzyme																			0	Low
PPM1H	protein phosphatase, Mg2+/Mn2+ dependent 1H	Q3UYC0	2.05e-05	1.07	phosphatase																			0	Low
PPP1R7	protein phosphatase 1 regulatory subunit 7	Q3UM45	0.00162	1.26	phosphatase																			0	Low
PPP1R9B	protein phosphatase 1 regulatory subunit 9B	Q6R891	0.000555	0.63	enzyme																			0	Low
PPP2R2A	protein phosphatase 2 regulatory subunit Balpha	Q6P1F6	4.51e-05	2.94	phosphatase																			0	Low
PPP3R1	protein phosphatase 3 regulatory subunit B, alpha	Q63810	0.00148	0.93	phosphatase																			0	Low
PREP	prolyl endopeptidase	Q9QUR6	0.00129	1.63	peptidase																			0	Low
PRMT8	protein arginine methyltransferase 8	Q6PAK3	0.0015	0.86	enzyme																			0	Low
PRUNE2	prune homolog 2 with BCH domain	Q52KR3	0.00071	-3.4	other																			0	Low
PRXL2A	peroxiredoxin like 2A	Q9CYH2	0.00215	1.02	other																			0	Low
PSMA8	proteasome 20S subunit alpha 8	Q9CWH6	0.00177	-0.68	peptidase																			0	Low
PSMC2	proteasome 26S subunit, ATPase 2	P46471	0.000987	0.84	peptidase																			0	Low
PTK2	protein tyrosine kinase 2	P34152	0.000279	1.55	kinase																			0	Low
PURA	purine rich element binding protein A	P42669	0.000486	1.04	transcription regulator																			0	Low
PYGL	glycogen phosphorylase L	Q9ET01	6.84e-06	-2.03	enzyme																			0	Low
RAB1B	RAB1B, member RAS oncogene family	Q9D1G1	0.00131	1.17	other																			0	Low
RAB3B	RAB3B, member RAS oncogene family	Q9CZT8	5.89e-05	-0.63	enzyme																			0	Low
RAB6A	RAB6A, member RAS oncogene family	P35279	0.00103	1.19	enzyme																			0	Low
RABEP1	rabaptin, RAB GTPase binding effector protein 1	O35551	7.61e-08	0.72	transporter																			0	Low
RAD50	RAD50 double strand break repair protein	P70388	3.36e-06	1.02	enzyme																			0	Low
RAPGEF4	Rap guanine nucleotide exchange factor 4	Q9EQZ6	0.000292	-0.71	other																			0	Low
RGS6	regulator of G protein signaling 6	Q9Z2H2	0.00024	-0.59	enzyme																			0	Low
RHEB	Ras homolog, mTORC1 binding	Q921J2	0.000716	0.69	enzyme																			0	Low
RPS16	ribosomal protein S16	P14131	1.13e-07	-0.76	other																			0	Low
RUFY3	RUN and FYVE domain containing 3	Q9D394	0.00135	-1.07	other																			0	Low
SARS1	seryl-tRNA synthetase 1	P26638	0.000735	1.45	enzyme																			0	Low
SCN9A	sodium voltage-gated channel alpha subunit 9	Q62205	0.00153	-0.61	ion channel																			0	Low
SEPTIN2	septin 2	P42208	0.0038	1.41	enzyme																			0	Low
SEPTIN3	septin 3	Q9Z1S5	0.000159	0.65	enzyme																			0	Low
SH3GL1	SH3 domain containing GRB2 like 1, endophilin A2	Q62419	0.00157	0.73	other																			0	Low
SHANK3	SH3 and multiple ankyrin repeat domains 3	Q4ACU6	0.000712	1.35	other																			0	Low
SHROOM2	shroom family member 2	A2ALU4	0.000336	1.09	ion channel																			0	Low
SIPA1L3	signal induced proliferation associated 1 like 3	G3X9J0	0.000293	-1.12	other																			0	Low
Skint5/Skint6	selection and upkeep of intraepithelial T cells 6	A7XUY5	9.5e-05	1.9	other																			0	Low
SLC12A5	solute carrier family 12 member 5	Q91V14	1.74e-05	-0.69	transporter																			0	Low
SLC12A7	solute carrier family 12 member 7	Q9WVL3	5.37e-08	-0.67	transporter																			0	Low
SLC16A1	solute carrier family 16 member 1	P53986	0.00578	-1.07	transporter																			0	Low
SLC1A2	solute carrier family 1 member 2	P43006	0.000212	-1.02	transporter																			0	Low
SLC6A17	solute carrier family 6 member 17	Q8BJI1	0.0023	1.18	transporter																			0	Low
SLC8A1	solute carrier family 8 member A1	P70414	0.00078	-0.63	transporter																			0	Low
SMC3	structural maintenance of chromosomes 3	Q9CW03	0.000561	1.01	other																			0	Low
SMC5	structural maintenance of chromosomes 5	Q8CG46	1.76e-07	-0.79	other																			0	Low
SNAP25	synaptosome associated protein 25	P60879	0.00634	0.72	transporter																			0	Low
SPATS2	spermatogenesis associated serine rich 2	Q8K1N4	3.67e-06	1.96	other																			0	Low
SRBD1	S1 RNA binding domain 1	Q497V5	0.00837	-0.61	other																			0	Low
SRCIN1	SRC kinase signaling inhibitor 1	Q9QWI6	0.000131	-0.6	other																			0	Low
SRGAP1	SLIT-ROBO Rho GTPase activating protein 1	Q91Z69	8.1e-05	0.69	other																			0	Low
SRGAP3	SLIT-ROBO Rho GTPase activating protein 3	Q812A2	2.01e-06	-0.93	other																			0	Low
SYNPO	synaptopodin	Q8CC35	1.92e-05	1.25	other																			0	Low
SYT1	synaptotagmin 1	P46096	0.00717	0.73	transporter																			0	Low
TGM5	transglutaminase 5	Q9D7I9	0.000143	-0.85	enzyme																			0	Low
THY1	Thy-1 cell surface antigen	P01831	0.00486	-0.66	other																			0	Low
TLN2	talin 2	Q71LX4	0.000181	-0.66	other																			0	Low
TMOD2	tropomodulin 2	Q9JKK7	1.62e-07	1.07	other																			0	Low
TNIK	TRAF2 and NCK interacting kinase	P83510	0.000108	1.28	kinase																			0	Low
TOM1L2	target of myb1 like 2 membrane trafficking protein	Q5SRX1	0.00142	-0.79	transporter																			0	Low
TOP2B	DNA topoisomerase II beta	Q64511	0.00554	1.23	enzyme																			0	Low
TPI1	triosephosphate isomerase 1	P17751	3.38e-05	-0.64	enzyme																			0	Low
TPP2	tripeptidyl peptidase 2	Q64514	0.0162	0.81	peptidase																			0	Low
TTC7B	tetratricopeptide repeat domain 7B	E9Q6P5	5.94e-05	1.41	other																			0	Low
TUBB4A	tubulin beta 4A class IVa	Q9D6F9	0.00154	-0.98	other																			0	Low
UACA	uveal autoantigen with coiled-coil domains and ankyrin repeats	Q8CGB3	1.46e-05	-0.61	other																			0	Low
UCHL1	ubiquitin C-terminal hydrolase L1	Q9R0P9	0.00535	0.96	peptidase																			0	Low
UIMC1	ubiquitin interaction motif containing 1	Q5U5Q9	0.000186	-0.72	other																			0	Low
UNC13C	unc-13 homolog C	Q8K0T7	0.00321	1.82	other																			0	Low
USO1	USO1 vesicle transport factor	Q9Z1Z0	1.18e-05	1.97	other																			0	Low
USP25	ubiquitin specific peptidase 25	P57080	1.47e-05	-1.71	peptidase																			0	Low
VCL	vinculin	Q64727	7.74e-05	-1.08	enzyme																			0	Low
VPS13C	vacuolar protein sorting 13 homolog C	Q8BX70	0.0206	-2.26	other																			0	Low
VPS26B	VPS26, retromer complex component B	Q8C0E2	7.13e-06	2	transporter																			0	Low
APPL1	adaptor protein, phosphotyrosine interacting with PH domain and leucine zipper 1	Q8K3H0	1.3e-05	1.74	other																			0	Low
AQP4	aquaporin 4	P55088	0.00163	-0.6	transporter																			0	Low
ARHGEF5	Rho guanine nucleotide exchange factor 5	E9Q7D5	0.00136	1.93	other																			0	Low
ARHGEF7	Rho guanine nucleotide exchange factor 7	Q9ES28	0.00473	-0.64	other																			0	Low
ASXL2	ASXL transcriptional regulator 2	Q8BZ32	0.00988	-0.7	other																			0	Low
ATP12A	ATPase H+/K+ transporting non-gastric alpha2 subunit	Q9Z1W8	4.13e-05	1.11	transporter																			0	Low
Atp5k	ATP synthase, H+ transporting, mitochondrial F1F0 complex, subunit E	Q06185	3.58e-08	0.76	enzyme																			0	Low
ATP5MG	ATP synthase membrane subunit g	Q9CPQ8	1.2e-05	1.84	enzyme																			0	Low
ABLIM1	actin binding LIM protein 1	Q8K4G5	0.000237	0.69	other																			0	Low
ACADL	acyl-CoA dehydrogenase long chain	P51174	0.000594	2.51	enzyme																			0	Low
ADAM11	ADAM metallopeptidase domain 11	Q9R1V4	0.00151	1.31	peptidase																			0	Low
ADCY9	adenylate cyclase 9	P51830	0.00298	1.32	enzyme																			0	Low
AGFG1	ArfGAP with FG repeats 1	Q8K2K6	0.000267	1.24	other																			0	Low
AKAP7	A-kinase anchoring protein 7	O55074	4.77e-10	0.73	other																			0	Low
ALDH2	aldehyde dehydrogenase 2 family member	P47738	0.00027	0.74	enzyme																			0	Low
ALDH6A1	aldehyde dehydrogenase 6 family member A1	Q9EQ20	0.00192	1.01	enzyme																			0	Low
AMPH	amphiphysin	Q7TQF7	1.27e-05	-0.69	other																			0	Low
ANK1	ankyrin 1	Q02357	0.0018	-0.9	other																			0	Low
ANKEF1	ankyrin repeat and EF-hand domain containing 1	Q9D2J7	0.000685	1.57	transcription regulator																			0	Low
ANKRD26	ankyrin repeat domain 26	Q811D2	0.000147	-0.94	transcription regulator																			0	Low
ATP5PO	ATP synthase peripheral stalk subunit OSCP	Q9DB20	0.00106	1.02	transporter																			0	Low
ATP6V1G2	ATPase H+ transporting V1 subunit G2	Q9WTT4	0.000377	-1.02	transporter																			0	Low
ATR	ATR serine/threonine kinase	Q9JKK8	0.000725	1.6	kinase																			0	Low
BAG5	BAG cochaperone 5	Q8CI32	0.00807	-1	other																			0	Low
BASP1	brain abundant membrane attached signal protein 1	Q91XV3	9.06e-07	-0.77	transcription regulator																			0	Low
BCAS1	brain enriched myelin associated protein 1	Q80YN3	0.0163	-0.61	other																			0	Low
BPNT1	3'(2'), 5'-bisphosphate nucleotidase 1	Q9Z0S1	2.12e-05	1.09	phosphatase																			0	Low
BRK1	BRICK1 subunit of SCAR/WAVE actin nucleating complex	Q91VR8	0.00433	1.16	other																			0	Low
BRSK2	BR serine/threonine kinase 2	Q69Z98	2.16e-06	-0.93	kinase																			0	Low
CACNA2D3	calcium voltage-gated channel auxiliary subunit alpha2delta 3	Q9Z1L5	0.00381	1.54	ion channel																			0	Low
CACNB4	calcium voltage-gated channel auxiliary subunit beta 4	Q8R0S4	5.36e-08	2.19	ion channel																			0	Low
CADM2	cell adhesion molecule 2	Q8BLQ9	3.22e-05	-0.64	other																			0	Low
CALB2	calbindin 2	Q08331	0.000295	1.27	other																			0	Low
CAMK2B	calcium/calmodulin dependent protein kinase II beta	P28652	0.00238	1.15	kinase																			0	Low
CAMK2G	calcium/calmodulin dependent protein kinase II gamma	Q923T9	0.000579	1.3	kinase																			0	Low
CAND1	cullin associated and neddylation dissociated 1	Q6ZQ38	0.000322	-0.78	transcription regulator																			0	Low
CASKIN1	CASK interacting protein 1	Q6P9K8	0.000417	0.59	transcription regulator																			0	Low
CCDC186	coiled-coil domain containing 186	Q8C9S4	0.0012	0.8	other																			0	Low
CDH13	cadherin 13	Q9WTR5	0.000247	1.44	other																			0	Low
CFL2	cofilin 2	P45591	0.000896	1.49	other																			0	Low
CHL1	cell adhesion molecule L1 like	P70232	0.00318	0.84	other																			0	Low
CISD1	CDGSH iron sulfur domain 1	Q91WS0	0.000914	1.57	other																			0	Low
CLASP1	cytoplasmic linker associated protein 1	Q80TV8	1.06e-06	0.61	other																			0	Low
CLASP2	cytoplasmic linker associated protein 2	Q8BRT1	0.000291	0.82	other																			0	Low
CLIP1	CAP-Gly domain containing linker protein 1	Q922J3	0.00284	0.68	other																			0	Low
CLIP2	CAP-Gly domain containing linker protein 2	Q9Z0H8	0.000163	0.63	transcription regulator																			0	Low
CNKSR2	connector enhancer of kinase suppressor of Ras 2	Q80YA9	0.00176	-0.64	other																			0	Low
CNRIP1	cannabinoid receptor interacting protein 1	Q5M8N0	9.62e-06	-0.82	other																			0	Low
CNTN2	contactin 2	Q61330	0.000391	1.58	other																			0	Low
CNTN4	contactin 4	Q69Z26	0.00487	0.89	enzyme																			0	Low
CNTNAP2	contactin associated protein 2	Q9CPW0	2.13e-10	-1.52	other																			0	Low
COL9A1	collagen type IX alpha 1 chain	Q05722	1.58e-05	3.06	other																			0	Low
COTL1	coactosin like F-actin binding protein 1	Q9CQI6	1.41e-05	-0.82	other																			0	Low
CPNE4	copine 4	Q8BLR2	1.32e-05	3.71	other																			0	Low
CRK	CRK proto-oncogene, adaptor protein	Q64010	0.000631	-0.65	other																			0	Low
CRYM	crystallin mu	O54983	1.96e-06	1.71	enzyme																			0	Low
CSNK2A2	casein kinase 2 alpha 2	O54833	0.000467	1.58	kinase																			0	Low
Cux1	cut-like homeobox 1	P70403	5.3e-05	1.74	transcription regulator																			0	Low
CYRIB	CYFIP related Rac1 interactor B	Q921M7	0.000496	1.51	other																			0	Low
DCLK2	doublecortin like kinase 2	Q6PGN3	7.01e-05	2.67	kinase																			0	Low
DES	desmin	P31001	0.00326	3.27	other																			0	Low
DLGAP4	DLG associated protein 4	B1AZP2	1.86e-08	0.75	other																			0	Low
DNAH17	dynein axonemal heavy chain 17	Q69Z23	0.00677	-1.58	other																			0	Low
DOCK9	dedicator of cytokinesis 9	Q8BIK4	2.79e-05	-1.19	other																			0	Low
DOP1B	DOP1 leucine zipper like protein B	Q3UHQ6	0.0118	-1	other																			0	Low
DPYSL4	dihydropyrimidinase like 4	O35098	0.0192	3.54	enzyme																			0	Low
DRC7	dynein regulatory complex subunit 7	Q6V3W6	0.000318	1.14	other																			0	Low
EFHD2	EF-hand domain family member D2	Q9D8Y0	2.55e-06	-0.72	other																			0	Low
EIF4A2	eukaryotic translation initiation factor 4A2	P10630	0.00429	-0.69	translation regulator																			0	Low
EMB	embigin	P21995	0.00121	-0.92	other																			0	Low
EPHX1	epoxide hydrolase 1	Q9D379	0.00122	0.93	peptidase																			0	Low
EPS15	epidermal growth factor receptor pathway substrate 15	P42567	0.0132	0.84	other																			0	Low
ERMN	ermin	Q5EBJ4	0.0047	3.41	other																			0	Low
EXOC2	exocyst complex component 2	Q9D4H1	9.19e-05	0.84	transporter																			0	Low
EXOC3	exocyst complex component 3	Q6KAR6	0.0017	0.61	transporter																			0	Low
EXOC4	exocyst complex component 4	O35382	4.6e-05	-0.66	transporter																			0	Low
FAM126B	family with sequence similarity 126 member B	Q8C729	0.00569	0.65	other																			0	Low
FAP	fibroblast activation protein alpha	P97321	2.45e-06	0.92	peptidase																			0	Low
FBXL16	F-box and leucine rich repeat protein 16	A2RT62	0.000772	1.41	other																			0	Low
FBXO41	F-box protein 41	Q6NS60	0.0007	1.2	other																			0	Low
FHOD3	formin homology 2 domain containing 3	Q76LL6	1.37e-07	0.81	other																			0	Low
FMNL2	formin like 2	A2APV2	0.0121	1.31	other																			0	Low
FRMD4B	FERM domain containing 4B	Q920B0	7.89e-05	-2.74	other																			0	Low
FUNDC2	FUN14 domain containing 2	Q9D6K8	0.00732	0.84	other																			0	Low
FXYD6	FXYD domain containing ion transport regulator 6	Q9D164	0.0122	1.22	ion channel																			0	Low
GABBR1	gamma-aminobutyric acid type B receptor subunit 1	Q9WV18	0.000102	1.09	G-protein coupled receptor																			0	Low
GABBR2	gamma-aminobutyric acid type B receptor subunit 2	Q80T41	2.96e-05	-0.66	G-protein coupled receptor																			0	Low
GABRB2	gamma-aminobutyric acid type A receptor subunit beta2	P63137	3.02e-08	1.38	ion channel																			0	Low
GAD1	glutamate decarboxylase 1	P48318	0.000135	-0.61	enzyme																			0	Low
GAL3ST2	galactose-3-O-sulfotransferase 2	Q6XQH0	5.57e-06	1.07	enzyme																			0	Low
GAP43	growth associated protein 43	P06837	3.48e-07	-1.01	other																			0	Low
GDAP1L1	ganglioside induced differentiation associated protein 1 like 1	Q8VE33	0.00656	0.82	other																			0	Low
GGT7	gamma-glutamyltransferase 7	Q99JP7	0.000782	0.8	enzyme																			0	Low
GLRX	glutaredoxin	Q9QUH0	0.000234	1.05	enzyme																			0	Low
GNA14	G protein subunit alpha 14	P30677	0.000112	-0.71	enzyme																			0	Low
GNAL	G protein subunit alpha L	Q8CGK7	0.00397	1.06	enzyme																			0	Low
GOLGA4	golgin A4	Q91VW5	5.46e-07	-1.39	other																			0	Low
GPHN	gephyrin	Q8BUV3	4.9e-05	0.69	enzyme																			0	Low
GPM6A	glycoprotein M6A	P35802	3.08e-05	-0.93	ion channel																			0	Low
GPRIN1	G protein regulated inducer of neurite outgrowth 1	Q3UNH4	1.44e-07	-0.87	other																			0	Low
GRIA4	glutamate ionotropic receptor AMPA type subunit 4	Q9Z2W8	0.00201	0.98	ion channel																			0	Low
GRIPAP1	GRIP1 associated protein 1	Q8VD04	1.61e-05	-0.96	other																			0	Low
GRM3	glutamate metabotropic receptor 3	Q9QYS2	9.84e-08	-1.17	G-protein coupled receptor																			0	Low
GSK3B	glycogen synthase kinase 3 beta	Q9WV60	0.000229	-0.94	kinase																			0	Low

## Sheet: Mouse model S DEPs
Supplementary Table S4. Lysosomal DEPs in the symptomatic Cln5-/- mouse model.
Gene Symbol	Description	UniProtID	p value	log2FC	Type(s)	Bovine_Lyso	Bovine_Lyso_score	Rat_Lyso_loc	Rat_Lyso_score	UniProt_mouse_Lyso	Score_UniProt_mouse_Lyso	MLGD_Literature source	Score_MLGD	HLGD_Literature source	Score_HLGD	GO:0005764_Comp	Confidence score_GO:0005764_Comp	GO_score	Cln3_KO_lysosomes	CLN6_nclf_lysosomes	CLN7_KO_lysosomes	Grn_KO_lysosomes	Score_NCL	Total score	Confidence
GJA1	gap junction protein alpha 1	P23242	0.000148	-0.71	transporter	sp	2			CXA1_MOUSE	2	Ashburner M 2000	2	Ashburner M 2000	2	GO:0005764	5	2						10	Very High
ALDOB	aldolase, fructose-bisphosphate B	Q91Y97	0.00213	3.46	enzyme					ALDOB_MOUSE	2	Ashburner M 2000	2	Ashburner M 2000	2	GO:0005764	5	2						8	Very High
ANK3	ankyrin 3	G5E8K5	2.89e-06	1.2	other					ANK3_MOUSE	2	Leinonen R 2004	2			GO:0005764	5	2				CLN11_lyso	2	8	Very High
ASS1	argininosuccinate synthase 1	P16460	0.000592	-0.74	enzyme					ASSY_MOUSE	2	Ashburner M 2000	2	Ashburner M 2000	2	GO:0005764	5	2						8	Very High
ATP6AP1	ATPase H+ transporting accessory protein 1	Q9R1Q9	0.000437	0.5	transporter			EL	2			Kanehisa M 2000	2	Kanehisa M 2000, Schröder B 2007	2				CLN3_lyso		CLN7_lyso		2	8	Very High
AP1M1	adaptor related protein complex 1 subunit mu 1	P35585	0.00736	0.69	transporter			Misc	1	AP1M1_MOUSE	2	Kanehisa M 2000	2	Kanehisa M 2000, Ashburner M 2000, Vastrik I 2007	2									7	Very High
AP3D1	adaptor related protein complex 3 subunit delta 1	O54774	0.00044	0.99	other			Misc	1	AP3D1_MOUSE	2	Kanehisa M 2000	2	Kanehisa M 2000, Schröder B 2007	2									7	Very High
DYNC1LI2	dynein cytoplasmic 1 light intermediate chain 2	Q6PDL0	2.93e-06	-0.8	other					DC1L2_MOUSE	2					GO:0005764	5	2						4	High
Marcks	myristoylated alanine rich protein kinase C substrate	P26645	6.49e-07	-0.73	other					MARCS_MOUSE	2					GO:0005764	5	2						4	High
RAB3A	RAB3A, member RAS oncogene family	P63011	0.00706	-1.61	enzyme					RAB3A_MOUSE	2					GO:0005764	5	2						4	High
PARK7	Parkinsonism associated deglycase	Q99LX0	7.66e-05	-0.76	enzyme	sp	2	Misc	1															3	High
SCAMP3	secretory carrier membrane protein 3	O35609	0.000472	-2.74	transporter	sp	2	Misc	1															3	High
SLC12A4	solute carrier family 12 member 4	Q9JIS8	0.000349	-0.65	transporter	tr	1							Schröder B 2007	2									3	High
ACADVL	acyl-CoA dehydrogenase very long chain	P50544	3.95e-05	0.83	enzyme	sp	2																	2	Medium
ASRGL1	asparaginase and isoaspartyl peptidase 1	Q8C0M9	0.000698	1.86	enzyme	sp	2																	2	Medium
CAPZA2	capping actin protein of muscle Z-line subunit alpha 2	P47754	0.00525	3.02	other	sp	2																	2	Medium
CHP1	calcineurin like EF-hand protein 1	P61022	0.000399	1.69	other	sp	2																	2	Medium
CPT2	carnitine palmitoyltransferase 2	P52825	4.2e-08	-1.07	enzyme	sp	2																	2	Medium
CTNNB1	catenin beta 1	Q02248	0.00206	-0.57	transcription regulator	sp	2																	2	Medium
DAAM1	dishevelled associated activator of morphogenesis 1	Q8BPM0	0.0114	-7.24	other	tr	1	Misc	1															2	Medium
DLST	dihydrolipoamide S-succinyltransferase	Q9D2G2	0.000369	0.83	enzyme	sp	2																	2	Medium
EIF5A	eukaryotic translation initiation factor 5A	P63242	1.88e-05	-0.87	translation regulator							Zhang H 2007	2											2	Medium
ERP29	endoplasmic reticulum protein 29	P57759	0.000404	1.34	transporter	sp	2																	2	Medium
ETFB	electron transfer flavoprotein subunit beta	Q9DCW4	0.00704	0.7	transporter	sp	2																	2	Medium
HSPE1	heat shock protein family E (Hsp10) member 1	Q64433	0.00743	0.75	enzyme	sp	2																	2	Medium
LDHB	lactate dehydrogenase B	P16125	0.00891	-0.65	enzyme	sp	2																	2	Medium
LONP1	lon peptidase 1, mitochondrial	Q8CGK3	0.000106	1.63	peptidase	sp	2																	2	Medium
MAP1LC3A	microtubule associated protein 1 light chain 3 alpha	Q91VR7	0.00563	-0.98	other											GO:0005764	5	2						2	Medium
MSN	moesin	P26041	0.000834	0.58	other	sp	2																	2	Medium
NDUFA12	NADH:ubiquinone oxidoreductase subunit A12	Q7TMF3	0.00568	1.36	enzyme	sp	2																	2	Medium
NDUFA13	NADH:ubiquinone oxidoreductase subunit A13	Q9ERS2	0.0113	0.49	enzyme	sp	2																	2	Medium
NDUFS8	NADH:ubiquinone oxidoreductase core subunit S8	Q8K3J1	0.00213	-1.25	enzyme	sp	2																	2	Medium
PC	pyruvate carboxylase	Q05920	0.00124	0.58	enzyme	sp	2																	2	Medium
PRDX1	peroxiredoxin 1	P35700	0.000481	-0.6	enzyme	sp	2																	2	Medium
PRDX5	peroxiredoxin 5	P99029	0.000945	0.69	enzyme	sp	2																	2	Medium
RPS9	ribosomal protein S9	Q6ZWN5	2.18e-05	0.81	translation regulator	sp	2																	2	Medium
RTN3	reticulon 3	Q9ES97	0.00223	0.51	other	sp	2																	2	Medium
SFXN1	sideroflexin 1	Q99JR1	3.01e-05	1.12	transporter	sp	2																	2	Medium
SLC1A4	solute carrier family 1 member 4	O35874	0.00216	3.19	transporter	sp	2																	2	Medium
SLC2A1	solute carrier family 2 member 1	P17809	0.00181	0.72	transporter	sp	2																	2	Medium
STX12	syntaxin 12	Q9ER00	3.33e-05	1.04	other			EL	2															2	Medium
STXBP1	syntaxin binding protein 1	O08599	6.42e-08	-0.56	transporter	sp	2																	2	Medium
TMEM65	transmembrane protein 65	Q4VAE3	0.000369	1.33	other	sp	2																	2	Medium
TRAP1	TNF receptor associated protein 1	Q9CQN1	1.86e-09	-0.82	enzyme	sp	2																	2	Medium
TXN	thioredoxin	P10639	9.93e-06	-0.55	enzyme	sp	2																	2	Medium
UQCRB	ubiquinol-cytochrome c reductase binding protein	Q9D855	6.37e-05	2.08	enzyme	sp	2																	2	Medium
VDAC2	voltage dependent anion channel 2	Q60930	5.64e-05	0.76	ion channel	sp	2																	2	Medium
YWHAZ	tyrosine 3-monooxygenase/tryptophan 5-monooxygenase activation protein zeta	P63101	4.58e-05	-0.7	enzyme	sp	2																	2	Medium
ALDH7A1	aldehyde dehydrogenase 7 family member A1	Q9DBF1	0.000324	0.97	enzyme	tr	1																	1	Medium
CASK	calcium/calmodulin dependent serine protein kinase	O70589	0.000321	0.6	kinase	tr	1																	1	Medium
CORO1C	coronin 1C	Q9WUM4	0.00106	1.12	other	tr	1																	1	Medium
CTNND1	catenin delta 1	P30999	0.000143	-1.07	other	tr	1																	1	Medium
KIAA1217	KIAA1217	A2AQ25	5.96e-05	1.21	other	tr	1																	1	Medium
MLEC	malectin	Q6ZQI3	1.64e-07	0.74	other	tr	1																	1	Medium
MTHFD1L	methylenetetrahydrofolate dehydrogenase (NADP+ dependent) 1 like	Q3V3R1	0.00278	0.86	enzyme	tr	1																	1	Medium
NDUFS3	NADH:ubiquinone oxidoreductase core subunit S3	Q9DCT2	0.000332	1.6	enzyme	tr	1																	1	Medium
OSBPL8	oxysterol binding protein like 8	B9EJ86	0.00111	-1.55	transporter	tr	1																	1	Medium
RHOG	ras homolog family member G	P84096	1.32e-06	-0.81	enzyme	tr	1																	1	Medium
SERBP1	SERPINE1 mRNA binding protein 1	Q9CY58	5.59e-07	0.77	other	tr	1																	1	Medium
SLC30A1	solute carrier family 30 member 1	Q60738	0.00401	0.82	transporter	tr	1																	1	Medium
SLC39A10	solute carrier family 39 member 10	Q6P5F6	0.000579	0.75	transporter	tr	1																	1	Medium
YWHAQ	tyrosine 3-monooxygenase/tryptophan 5-monooxygenase activation protein theta	P68254	0.00473	-3.68	other	tr	1																	1	Medium
ADAM11	ADAM metallopeptidase domain 11	Q9R1V4	0.000352	1.71	peptidase																			0	Low
ADAM22	ADAM metallopeptidase domain 22	Q9R1V6	4.54e-05	-0.65	peptidase																			0	Low
ADD3	adducin 3	Q9QYB5	0.00444	0.8	other																			0	Low
AHCY	adenosylhomocysteinase	P50247	0.000302	0.73	enzyme																			0	Low
ASTN1	astrotactin 1	Q61137	0.00221	1.16	other																			0	Low
Atp5k	ATP synthase, H+ transporting, mitochondrial F1F0 complex, subunit E	Q06185	2.37e-05	0.6	enzyme																			0	Low
ATP5MG	ATP synthase membrane subunit g	Q9CPQ8	0.00067	1.16	enzyme																			0	Low
ATP8A2	ATPase phospholipid transporting 8A2	P98200	0.0013	-0.8	transporter																			0	Low
ATR	ATR serine/threonine kinase	Q9JKK8	0.0107	0.66	kinase																			0	Low
BASP1	brain abundant membrane attached signal protein 1	Q91XV3	0.00205	-0.7	transcription regulator																			0	Low
BCAS1	brain enriched myelin associated protein 1	Q80YN3	6.05e-09	-0.55	other																			0	Low
BICD2	BICD cargo adaptor 2	Q921C5	0.00564	1.52	other																			0	Low
BRK1	BRICK1 subunit of SCAR/WAVE actin nucleating complex	Q91VR8	0.0012	2.85	other																			0	Low
CACNA2D3	calcium voltage-gated channel auxiliary subunit alpha2delta 3	Q9Z1L5	0.00232	2	ion channel																			0	Low
CAMK2B	calcium/calmodulin dependent protein kinase II beta	P28652	0.000362	1.49	kinase																			0	Low
CAMK2G	calcium/calmodulin dependent protein kinase II gamma	Q923T9	0.00233	1.41	kinase																			0	Low
CD9	CD9 molecule	P40240	0.00161	-1.01	other																			0	Low
CEP152	centrosomal protein 152	A2AUM9	0.000716	0.74	other																			0	Low
CLASP1	cytoplasmic linker associated protein 1	Q80TV8	0.00316	0.89	other																			0	Low
CLASP2	cytoplasmic linker associated protein 2	Q8BRT1	0.00159	0.74	other																			0	Low
CLIP1	CAP-Gly domain containing linker protein 1	Q922J3	2.02e-05	-0.82	other																			0	Low
CNTN4	contactin 4	Q69Z26	2.12e-08	2.89	enzyme																			0	Low
CNTNAP2	contactin associated protein 2	Q9CPW0	0.000294	-0.73	other																			0	Low
COL9A1	collagen type IX alpha 1 chain	Q05722	0.000987	1.66	other																			0	Low
CPNE4	copine 4	Q8BLR2	0.0109	2.94	other																			0	Low
CRYM	crystallin mu	O54983	0.00241	0.78	enzyme																			0	Low
CTBP1	C-terminal binding protein 1	O88712	0.0119	1.29	enzyme																			0	Low
DIRAS2	DIRAS family GTPase 2	Q5PR73	0.000412	0.68	enzyme																			0	Low
DOCK9	dedicator of cytokinesis 9	Q8BIK4	0.00052	-0.78	other																			0	Low
DPYSL5	dihydropyrimidinase like 5	Q9EQF6	0.0074	-1.15	enzyme																			0	Low
EFR3B	EFR3 homolog B	Q6ZQ18	0.00273	1.24	other																			0	Low
ERLIN1	ER lipid raft associated 1	Q91X78	1.64e-05	-0.8	other																			0	Low
FBXL16	F-box and leucine rich repeat protein 16	A2RT62	0.00417	1.95	other																			0	Low
FUNDC2	FUN14 domain containing 2	Q9D6K8	0.000167	1.38	other																			0	Low
FXYD6	FXYD domain containing ion transport regulator 6	Q9D164	0.00375	1.56	ion channel																			0	Low
GABBR1	gamma-aminobutyric acid type B receptor subunit 1	Q9WV18	0.00166	0.88	G-protein coupled receptor																			0	Low
GAD1	glutamate decarboxylase 1	P48318	0.00356	-0.6	enzyme																			0	Low
GAP43	growth associated protein 43	P06837	6.43e-06	-0.61	other																			0	Low
GIT1	GIT ArfGAP 1	Q68FF6	0.00011	-0.72	kinase																			0	Low
GLRX	glutaredoxin	Q9QUH0	0.00394	0.68	enzyme																			0	Low
GNA14	G protein subunit alpha 14	P30677	0.00144	-2.12	enzyme																			0	Low
GNAL	G protein subunit alpha L	Q8CGK7	0.00521	0.75	enzyme																			0	Low
GOLGA4	golgin A4	Q91VW5	0.000208	-0.78	other																			0	Low
GPRIN1	G protein regulated inducer of neurite outgrowth 1	Q3UNH4	0.000152	-0.57	other																			0	Low
GRIN2A	glutamate ionotropic receptor NMDA type subunit 2A	P35436	0.00998	-0.68	ion channel																			0	Low
HNMT	histamine N-methyltransferase	Q91VF2	0.00404	-0.85	enzyme																			0	Low
HSPA1L	heat shock protein family A (Hsp70) member 1 like	P16627	0.000238	1.26	other																			0	Low
HSPH1	heat shock protein family H (Hsp110) member 1	Q61699	1.35e-05	0.66	other																			0	Low
KCTD12	potassium channel tetramerization domain containing 12	Q6WVG3	0.0105	0.86	ion channel																			0	Low
LANCL1	LanC like 1	O89112	0.00012	-3.23	enzyme																			0	Low
LINGO1	leucine rich repeat and Ig domain containing 1	Q9D1T0	0.00291	0.93	other																			0	Low
LNPK	lunapark, ER junction formation factor	Q7TQ95	7.2e-05	-0.64	other																			0	Low
LXN	latexin	P70202	0.0034	3.07	other																			0	Low
MAG	myelin associated glycoprotein	P20917	0.00562	1.65	other																			0	Low
MAOA	monoamine oxidase A	Q64133	0.00219	0.79	enzyme																			0	Low
MAP4K4	mitogen-activated protein kinase kinase kinase kinase 4	P97820	7.31e-05	1.52	kinase																			0	Low
MARCKSL1	MARCKS like 1	P28667	0.000473	-1.16	other																			0	Low
MARK2	microtubule affinity regulating kinase 2	Q05512	0.00394	0.53	kinase																			0	Low
MBP	myelin basic protein	P04370	2.53e-07	-1.01	other																			0	Low
MMUT	methylmalonyl-CoA mutase	P16332	0.000288	1.09	enzyme																			0	Low
NCAM2	neural cell adhesion molecule 2	O35136	0.00149	-0.64	other																			0	Low
NCK1	NCK adaptor protein 1	Q99M51	0.00634	1.83	kinase																			0	Low
NDUFB8	NADH:ubiquinone oxidoreductase subunit B8	Q9D6J5	0.000606	1.36	enzyme																			0	Low
NLGN2	neuroligin 2	Q69ZK9	0.00177	1.16	enzyme																			0	Low
PABPC1	poly(A) binding protein cytoplasmic 1	P29341	0.00703	-1.1	translation regulator																			0	Low
PACSIN1	protein kinase C and casein kinase substrate in neurons 1	Q61644	2.57e-07	-0.62	kinase																			0	Low
PDE10A	phosphodiesterase 10A	Q8CA95	0.00569	0.79	enzyme																			0	Low
PEBP1	phosphatidylethanolamine binding protein 1	P70296	1.4e-06	-0.72	other																			0	Low
PFKM	phosphofructokinase, muscle	P47857	2.08e-05	0.8	kinase																			0	Low
PFN2	profilin 2	Q9JJV2	0.00065	0.75	enzyme																			0	Low
PHF24	PHD finger protein 24	Q80TL4	0.000104	-0.56	other																			0	Low
PKLR	pyruvate kinase L/R	P53657	0.00127	1	kinase																			0	Low
PLCB1	phospholipase C beta 1	Q9Z1B3	0.000187	-0.74	enzyme																			0	Low
PLP1	proteolipid protein 1	P60202	3.37e-08	-1.04	other																			0	Low
PLPP3	phospholipid phosphatase 3	Q99JY8	6.87e-05	0.49	phosphatase																			0	Low
PLXNA1	plexin A1	P70206	0.00112	0.62	transmembrane receptor																			0	Low
PLXND1	plexin D1	Q3UH93	0.0129	1.26	transmembrane receptor																			0	Low
PPP1R12A	protein phosphatase 1 regulatory subunit 12A	Q9DBR7	6.55e-08	0.76	phosphatase																			0	Low
PPP1R7	protein phosphatase 1 regulatory subunit 7	Q3UM45	0.00818	1.32	phosphatase																			0	Low
PPP1R9B	protein phosphatase 1 regulatory subunit 9B	Q6R891	2.01e-06	0.68	enzyme																			0	Low
PPP2R2D	protein phosphatase 2 regulatory subunit Bdelta	Q925E7	0.00561	-0.72	other																			0	Low
PRXL2A	peroxiredoxin like 2A	Q9CYH2	0.00223	1.1	other																			0	Low
PSMA4	proteasome 20S subunit alpha 4	Q9R1P0	1.84e-05	-0.73	peptidase																			0	Low
PSMC2	proteasome 26S subunit, ATPase 2	P46471	0.000723	0.83	peptidase																			0	Low
PSMD2	proteasome 26S subunit, non-ATPase 2	Q8VDM4	0.00859	0.78	other																			0	Low
PTK2	protein tyrosine kinase 2	P34152	0.00164	1.29	kinase																			0	Low
RAB1B	RAB1B, member RAS oncogene family	Q9D1G1	0.00177	0.81	other																			0	Low
RAB3B	RAB3B, member RAS oncogene family	Q9CZT8	0.000206	-0.68	enzyme																			0	Low
RAB3C	RAB3C, member RAS oncogene family	P62823	0.00841	-2.33	enzyme																			0	Low
RAB3GAP1	RAB3 GTPase activating protein catalytic subunit 1	Q80UJ7	1.91e-07	1.48	other																			0	Low
RAB5A	RAB5A, member RAS oncogene family	Q9CQD1	0.00243	0.81	enzyme																			0	Low
RAB6A	RAB6A, member RAS oncogene family	P35279	0.00072	1.56	enzyme																			0	Low
SAFB2	scaffold attachment factor B2	Q80YR5	0.000924	-3.91	other																			0	Low
SARS1	seryl-tRNA synthetase 1	P26638	0.0113	1.1	enzyme																			0	Low
SCN4A	sodium voltage-gated channel alpha subunit 4	Q9ER60	0.000204	1.23	ion channel																			0	Low
SHANK3	SH3 and multiple ankyrin repeat domains 3	Q4ACU6	0.00265	1.2	other																			0	Low
SLC12A7	solute carrier family 12 member 7	Q9WVL3	0.000174	-0.56	transporter																			0	Low
SLC1A3	solute carrier family 1 member 3	P56564	0.000495	1.44	transporter																			0	Low
SLC25A22	solute carrier family 25 member 22	Q9D6M3	1.37e-05	0.56	transporter																			0	Low
SLC4A10	solute carrier family 4 member 10	Q5DTL9	1.66e-06	0.81	transporter																			0	Low
SNAP25	synaptosome associated protein 25	P60879	0.0117	0.61	transporter																			0	Low
SNAP91	synaptosome associated protein 91	Q61548	0.000264	-0.61	other																			0	Low
SNCA	synuclein alpha	O55042	1.28e-06	2.59	enzyme																			0	Low
SRBD1	S1 RNA binding domain 1	Q497V5	0.000158	-0.54	other																			0	Low
STARD9	StAR related lipid transfer domain containing 9	Q80TF6	6.44e-06	-0.7	other																			0	Low
SYNPO	synaptopodin	Q8CC35	0.00148	0.47	other																			0	Low
TMOD2	tropomodulin 2	Q9JKK7	0.000821	0.84	other																			0	Low
TNIK	TRAF2 and NCK interacting kinase	P83510	0.00181	-0.64	kinase																			0	Low
TPI1	triosephosphate isomerase 1	P17751	3.22e-06	-0.58	enzyme																			0	Low
TRIO	trio Rho guanine nucleotide exchange factor	Q0KL02	0.000255	-0.6	kinase																			0	Low
TTC7B	tetratricopeptide repeat domain 7B	E9Q6P5	6.5e-05	1.12	other																			0	Low
USO1	USO1 vesicle transport factor	Q9Z1Z0	0.00175	0.77	other																			0	Low
WFS1	wolframin ER transmembrane glycoprotein	P56695	6.32e-08	-0.91	enzyme																			0	Low
VPS26B	VPS26, retromer complex component B	Q8C0E2	0.000713	1.48	transporter																			0	Low
VSNL1	visinin like 1	P62761	5.32e-06	-0.67	other																			0	Low
YWHAG	tyrosine 3-monooxygenase/tryptophan 5-monooxygenase activation protein gamma	P61982	0.00809	0.69	other																			0	Low

## Sheet: Cell Model DF
Supplementary Table S5. Disease and function annotations in the CLN5 KO model.
Diseases or Functions Annotation	Activation z-score	p-value	# Molecules	Molecules
Catabolism of protein	1.974	0.00762	10	CD81,CTSA,CTSB,FLNA,GAPDH,HSPA1A/HSPA1B,LAMP2,LNPEP,NPM1,SEC22B
Metabolism of glycosphingolipid	1.951	3.98e-05	5	CTSA,GLA,GLB1,HEXB,OSBP
Metabolism of sphingolipid	1.951	0.000201	6	ALDH3A2,CTSA,GLA,GLB1,HEXB,OSBP
Metabolism of protein	1.568	8.78e-05	20	CD81,CTSA,CTSB,CYFIP1,EIF3B,FLNA,GAPDH,GFM1,GOLM1,HEXB,HSPA1A/HSPA1B,LAMP2,LNPEP,NPM1,PABPC1,PRKCA,RPL18,S100A9,SEC22B,TCOF1
Quantity of cytokine	-1.633	0.00305	6	ARHGDIA,HEXB,KRT1,LNPEP,S100A9,SCARB1
Neuritogenesis	-1.702	0.00778	10	ARHGDIA,CALD1,CYFIP1,EPB41L3,FLNA,NEFM,PRKCA,RAB11A,TMEM106B,TNIK
Phagocytosis of cells	-1.731	0.0059	7	CYFIP1,FLNA,NPM1,PRKCA,RAB11A,S100A9,SCARB1
Endocytosis	-1.768	2.7e-05	14	ACTN4,ADD1,AP2A1,CD63,CYFIP1,FLNA,NPM1,PRKCA,RAB11A,RAB5C,S100A9,SCARB1,TFRC,VAMP8
Organismal death	-1.828	0.000728	30	ACTN4,ADD1,ARF4,ARHGDIA,CHD4,CTSA,CTSB,EPB41L3,FLNA,GLB1,GNAI1,GOLM1,H1-3,HEXB,KIF1A,KRT1,KRT5,LAMP2,MDH1,NPM1,PKP2,PRKCA,RAB11A,S100A9,SCARB1,SETD2,TCOF1,TFRC,TMED10,TOP1
Quantity of interleukin	-2	0.00585	4	ARHGDIA,HEXB,KRT1,SCARB1
Engulfment of cells	-2.011	1.92e-05	13	ACTN4,ADD1,AP2A1,CD63,CYFIP1,FLNA,NPM1,PRKCA,RAB11A,RAB5C,S100A9,SCARB1,VAMP8
3.98e-05			0.05
	p value
-2			2
	Activation z-score

## Sheet: Cell Model UR
Supplementary Table S6. Upstream regulators in the CLN5 KO model.
Upstream Regulator	Molecule Type	Activation z-score	p-value of overlap	Target Molecules in Dataset
Akt	group	1.912	0.00146	CD63,HM13,MT-CO2,SCARB1,TMED10,TMED9,TMEM106B
ASPSCR1-TFE3	fusion gene/product	2.236	6.8e-05	CTSA,GLB1,GNS,SCARB1,SCPEP1
ESRRG	ligand-dependent nuclear receptor	2.236	1.61e-05	DLAT,GAPDH,IDH3A,MDH1,MDH2
HRAS	enzyme	2	0.00997	CALD1,CD81,CTSB,ERP29,FLNA,LASP1,NPM1,PRKCA
IFNG	cytokine	1.549	0.0249	CD63,CTSB,GFM1,GLA,HSPA1A/HSPA1B,NEFM,OCLN,PRKCA,S100A7,S100A9,SCARB1,TFRC
PRKCA	kinase	1.969	0.000208	CTSB,HSPA1A/HSPA1B,LAMP2,S100A9,SDCBP
PRL	cytokine	1.521	0.00154	CTSA,CTSB,KRT5,OCLN,PDIA4,SCARB1
PTEN	phosphatase	-1.539	5.82e-05	ARF4,ARHGDIA,CTSB,DLAT,GAPDH,HEXB,HSPA1A/HSPA1B,IDH3A,LAMP2,MDH1,MT-CO2,RAB5C
TFEB	transcription regulator	2.209	1.08e-06	CTSA,CTSB,GLA,GNS,SCPEP1
TP63	transcription regulator	2.501	0.00534	GAPDH,GNAI1,KRT1,KRT10,KRT6A,PKP2,S100A7
TSC2	other	-2.219	0.000289	GLA,PLP2,PRKCA,SCPEP1,VAMP8
0.00997		0.05
	p value
-2		2
	Activation z-score

## Sheet: Mouse model DF
Supplementary Table S7. Comparative analysis of disease and function annotations in Cln5-/- mice.
Bioinformatic filtering of DEP				Bioinformatic filtering of DEP | lyso-score
Diseases and Functions	early	late		Diseases and Functions	early	late
Morphogenesis of neurons	0	-2.714		Oxidation of fatty acid	0	-1.982
Shape change of neurons	0	-2.372		Engulfment of cells	1.45	2.34
Polymerization of actin	0	2		Production of reactive oxygen species	0.549	2.219
Quantity of dendritic spines	0	1.969		Synthesis of reactive oxygen species	0.259	1.761
Perinatal death	0	1.737		Sirtuin Signaling Pathway	-1.897	-1.134
Outgrowth of neurons	0	-1.726
Activation of neurons	0	-1.673				Activation z-score
Paired-pulse facilitation of synapse	0	1.664		-3				3
Startle response	0	1.528
Viral Infection	3.568	2.817
Cell movement of fibroblasts	2.667	0
Metabolism of protein	2.27	0
Endocytosis	2.219	1.652
Degranulation	2.219	0
Fibrogenesis	2.147	-0.259
Engulfment cells	2.127	1.601
Cancer	2.108	0
Formation of filaments	2.079	0.091
Renal lesion	2	0
Organization of actin cytoskeleton	2	0
Malignant neoplasm of retroperitoneum	2	0
Exocytosis by cells	1.99	0.333
Malignant genitourinary solid tumor	1.982	1.103
Degranulation of cells	1.982	0
Elongation of filaments	1.969	0
Formation of cytoskeleton	1.914	-0.473
Cardiogenesis	1.894	0
Solid tumor	1.878	1.353
Development of cytoplasm	1.865	-0.132
Polymerization of filaments	1.865	0
Malignant solid tumor	1.839	0.808
Cell movement	1.795	1.172
Development of malignant tumor	1.751	0
Stabilization of filaments	1.743	0
Bundling of filaments	1.732	0
Cell movement of fibroblast cell lines	1.674	0.11
Fusion of vesicles	1.673	0
Disassembly of actin filaments	1.65	0
Cell viability	1.641	0
M phase	1.613	0
Cytokinesis	1.613	0
Cell survival	1.612	0
Hypersensitive reaction	1.572	0
Exocytosis	1.559	-0.328
Secretory pathway	1.559	0
Neoplasia of cells	1.52	-0.452
Synaptic transmission	1.503	-0.112
Release of neurotransmitter	1.501	-0.762
Cell movement of epithelial cell lines	1.295	2.236
Organization of cytoplasm	0.488	-2.381
Organization of cytoskeleton	0.484	-2.381
Development of neurons	-0.105	-2.378
Dendritic growth/branching	-0.328	-1.907
Neuritogenesis	-0.415	-2.714
Outgrowth of cells	-0.491	-1.669
Branching of neurites	-0.531	-2.011
Proliferation of neuronal cells	-0.674	-1.871
Outgrowth of neurites	-0.7	-1.735
Branching of neurons	-0.973	-2.372
Branching of cells	-0.988	-2.56
Growth of neurites	-1.092	-1.968
Sprouting	-1.544	-2.555
Abnormality of cerebral cortex	-1.664	-0.651
Axonogenesis	-1.762	-2.543
Apoptosis	-1.812	-0.471
Urination disorder	-1.831	0
Neuronal cell death	-1.934	0.868
Extension of cellular protrusions	-1.976	-2.8
Fragmentation of Golgi apparatus	-2.201	0

## Sheet: Mouse Model UR
Supplementary Table S8. Comparative analysis of upstream regulators in Cln5-/- mice.
Upstream Regulators	early	late
IL5	1.633			-2		2
BHLHE40	1.254	1.982			Activation z-score
FOS	2.326	1
MTOR	2.382	0.246
PPARGC1A	2.856	-0.038
RICTOR	-1.941	-1.342
CLPP	-3.051	-2

## Sheet: Mouse Model BFA
Supplementary Table S9. Biomarker filter analysis.
Symbol	Family	Drug(s)	log2FC		Lysosomal confidence	DETECTABILITY
			early	late		Blood	CSF	Plasma/ Serum
ACADVL	enzyme		1010	0.83	Medium	x		x
ALDOB	enzyme		2880	3460	Very High	x		x
ANK3	other		1550	1200	Very High	x		x
AP3D1	other		0.92	0.99	Very High	x		x
ATP6AP1	transporter		0.77	0.5	Very High		x
GJA1	transporter		-0.68	-0.71	Very High	x
DYNC1LI2	other		-1050	-0.8	High	x		x
PARK7	enzyme		-0.79	-0.76	High	x	x	x
SCAMP3	transporter		-0.83	-2740	High	x
SLC12A4	transporter	bumetanide	-1040	-0.65	High	x		x
CORO1C	other		2220	1120	Medium	x		x
CPT2	enzyme	perhexiline	-1200	-1070	Medium	x		x
OSBPL8	transporter		1320	-1550	Medium	x
PRDX1	enzyme		-0.66	-0.6	Medium	x	x	x
PRDX5	enzyme	auranofin	1320	0.69	Medium	x
SLC2A1	transporter	metformin	0.93	0.72	Medium	x
SLC39A10	transporter		1120	0.75	Medium	x		x
STX12	other		1210	1040	Medium	x
TXN	enzyme	PX-12	-0.61	-0.55	Medium	x		x

## Sheet: Zebrafish sequences
Supplementary Table S10. Target sequences and primers for morpholino cln5 zebrafish model.
Morpholino	Sequence
cln5-spliceMO	CGCCTAGAAATTGATAAGATGGTGT
cln5-atgMO	AATACTTCATTTCTGCCCCAGGCTC
Primers
cln5-ish-f	GGTGACATCATGGGAAAGTTTCA
cln5-ish-r	AGGATATTTCATGGGCAACTTCC
cln5-rt-f	TAGGAGAAATTTCAGGCAAGCTG
cln5-rt-r	TATATGTGCGGTGAACAAACTGG
cln5-cds-f	CCGGAATTCATGAAGTATTCCGTTTATTTTC
cln5-cds-r	CCGCTCGAGTCATGGAAAAGGAATCTCCT
